# Supplementary material for: Identifying the Most Probable Mammal Reservoir Hosts for Monkeypox Virus Based on Ecological Niche Comparisons
Source: MDPI journal article supplement (doi:10.3390/v15030727), 2023-03-11
Supplement: s1 [file s1]

**Table S1: Classification, habitat preference and ecological niche data for all selected mammal species.**

| Order        | Family      | Species                          | African rainforests | Prevalence            | Occurrence records (not filtered) | AUC (min-max; 95 CI)             | D     | I      | Overlap rank |
|--------------|-------------|----------------------------------|---------------------|-----------------------|-----------------------------------|----------------------------------|-------|--------|--------------|
| Eulipotyphla | Erinaceidae | <i>Atelerix albiventris</i>      | WA                  | widespread (0.231)    | 164 (293)                         | 0.861 (0.833-0.888; 0.848-0.873) | 0.442 | 0.733  | 61           |
| Eulipotyphla | Erinaceidae | <i>Atelerix frontalis</i>        | not present         | narrow-ranged (0.034) | 38 (85)                           | 0.874 (0.749-0.922; 0.84-0.908)  | 0.200 | 0.478  | 97           |
| Eulipotyphla | Erinaceidae | <i>Atelerix sclateri</i>         | not present         | narrow-ranged (0.01)  | 0 (0)                             | NA                               | NA    | NA     | NA           |
| Eulipotyphla | Soricidae   | <i>Crociodura afeworkbekelei</i> | not present         | narrow-ranged (0)     | 0 (0)                             | NA                               | NA    | NA     | NA           |
| Eulipotyphla | Soricidae   | <i>Crociodura allex</i>          | not present         | narrow-ranged (0)     | 15 (23)                           | 0.949 (0.883-0.984; 0.925-0.972) | 0.336 | 0.657  | 83           |
| Eulipotyphla | Soricidae   | <i>Crociodura ansellorum</i>     | not present         | narrow-ranged (0)     | 0 (0)                             | NA                               | NA    | NA     | NA           |
| Eulipotyphla | Soricidae   | <i>Crociodura attila</i>         | CA                  | narrow-ranged (0.027) | 3 (5)                             | NA                               | NA    | NA     | NA           |
| Eulipotyphla | Soricidae   | <i>Crociodura baileyi</i>        | not present         | narrow-ranged (0.001) | 5 (9)                             | NA                               | NA    | NA     | NA           |
| Eulipotyphla | Soricidae   | <i>Crociodura batesi</i>         | CA                  | narrow-ranged (0.015) | 7 (12)                            | NA                               | NA    | NA     | NA           |
| Eulipotyphla | Soricidae   | <i>Crociodura bottegi</i>        | not present         | narrow-ranged (0.002) | 1 (1)                             | NA                               | NA    | NA     | NA           |
| Eulipotyphla | Soricidae   | <i>Crociodura bottegoides</i>    | not present         | narrow-ranged (0)     | 1 (2)                             | NA                               | NA    | NA     | NA           |
| Eulipotyphla | Soricidae   | <i>Crociodura buettikoferi</i>   | WA                  | narrow-ranged (0.002) | 29 (49)                           | 0.988 (0.944-1; 0.977-0.998)     | 0.487 | 0.779  | 43           |
| Eulipotyphla | Soricidae   | <i>Crociodura caliginea</i>      | CA                  | narrow-ranged (0.003) | 8 (28)                            | NA                               | NA    | NA     | NA           |
| Eulipotyphla | Soricidae   | <i>Crociodura cinderella</i>     | not present         | narrow-ranged (0.028) | 1 (1)                             | NA                               | NA    | NA     | NA           |
| Eulipotyphla | Soricidae   | <i>Crociodura congobelgica</i>   | CA                  | narrow-ranged (0.003) | 0 (0)                             | NA                               | NA    | NA     | NA           |
| Eulipotyphla | Soricidae   | <i>Crociodura crenata</i>        | CA                  | narrow-ranged (0.016) | 14 (20)                           | 0.697 (0.277-0.975; 0.558-0.835) | 0.436 | 0.776  | 52           |
| Eulipotyphla | Soricidae   | <i>Crociodura crossei</i>        | WA                  | narrow-ranged (0.036) | 24 (29)                           | 0.967 (0.948-0.985; 0.96-0.975)  | 0.513 | 0.806  | 32           |
| Eulipotyphla | Soricidae   | <i>Crociodura cyanea</i>         | not present         | narrow-ranged (0.09)  | 43 (51)                           | 0.938 (0.887-0.973; 0.921-0.956) | 0.289 | 0.599  | 89           |
| Eulipotyphla | Soricidae   | <i>Crociodura denti</i>          | CA + WA             | narrow-ranged (0.039) | 24 (54)                           | 0.93 (0.846-0.982; 0.898-0.962)  | 0.631 | 0.8886 | 13           |
| Eulipotyphla | Soricidae   | <i>Crociodura desperata</i>      | not present         | narrow-ranged (0.001) | 4 (6)                             | NA                               | NA    | NA     | NA           |
| Eulipotyphla | Soricidae   | <i>Crociodura dolichura</i>      | CA + WA             | narrow-ranged (0.049) | 41 (66)                           | 0.928 (0.831-0.975; 0.898-0.958) | 0.617 | 0.874  | 16           |
| Eulipotyphla | Soricidae   | <i>Crociodura douceti</i>        | WA                  | narrow-ranged (0.003) | 11 (15)                           | NA                               | NA    | NA     | NA           |
| Eulipotyphla | Soricidae   | <i>Crociodura eburnea</i>        | WA                  | narrow-ranged (0.006) | 5 (11)                            | NA                               | NA    | NA     | NA           |
| Eulipotyphla | Soricidae   | <i>Crociodura elenae</i>         | WA                  | narrow-ranged (0)     | 0 (0)                             | NA                               | NA    | NA     | NA           |
| Eulipotyphla | Soricidae   | <i>Crociodura elgonius</i>       | not present         | narrow-ranged (0.003) | 16 (33)                           | 0.842 (0.684-0.926; 0.797-0.887) | 0.441 | 0.774  | 50           |
| Eulipotyphla | Soricidae   | <i>Crociodura erica</i>          | not present         | narrow-ranged (0.004) | 4 (7)                             | NA                               | NA    | NA     | NA           |
| Eulipotyphla | Soricidae   | <i>Crociodura fingui</i>         | not present         | narrow-ranged (0)     | 0 (0)                             | NA                               | NA    | NA     | NA           |
| Eulipotyphla | Soricidae   | <i>Crociodura fischeri</i>       | not present         | narrow-ranged (0)     | 1 (2)                             | NA                               | NA    | NA     | NA           |
| Eulipotyphla | Soricidae   | <i>Crociodura flavescens</i>     | not present         | narrow-ranged (0.01)  | 18 (35)                           | 0.924 (0.855-0.966; 0.898-0.95)  | 0.533 | 0.830  | 27           |
| Eulipotyphla | Soricidae   | <i>Crociodura foxi</i>           | not present         | narrow-ranged (0.055) | 16 (20)                           | 0.851 (0.737-0.946; 0.798-0.905) | 0.410 | 0.714  | 72           |
| Eulipotyphla | Soricidae   | <i>Crociodura fulvastra</i>      | not present         | narrow-ranged (0.143) | 16 (28)                           | 0.854 (0.64-0.972; 0.787-0.921)  | 0.486 | 0.807  | 37           |
| Eulipotyphla | Soricidae   | <i>Crociodura fumosa</i>         | not present         | narrow-ranged (0.001) | 20 (29)                           | 0.916 (0.872-0.999; 0.885-0.947) | 0.255 | 0.589  | 91           |
| Eulipotyphla | Soricidae   | <i>Crociodura fuscomurina</i>    | not present         | widespread (0.323)    | 74 (120)                          | 0.803 (0.712-0.864; 0.77-0.836)  | 0.474 | 0.794  | 41           |
| Eulipotyphla | Soricidae   | <i>Crociodura glassi</i>         | not present         | narrow-ranged (0)     | 3 (9)                             | NA                               | NA    | NA     | NA           |
| Eulipotyphla | Soricidae   | <i>Crociodura goliath</i>        | CA                  | narrow-ranged (0.033) | 25 (34)                           | 0.91 (0.749-0.988; 0.846-0.974)  | 0.479 | 0.747  | 49           |
| Eulipotyphla | Soricidae   | <i>Crociodura grandiceps</i>     | WA                  | narrow-ranged (0.001) | 26 (38)                           | 0.967 (0.921-0.997; 0.949-0.986) | 0.465 | 0.776  | 46           |
| Eulipotyphla | Soricidae   | <i>Crociodura grassei</i>        | CA                  | narrow-ranged (0.012) | 11 (13)                           | NA                               | NA    | NA     | NA           |
| Eulipotyphla | Soricidae   | <i>Crociodura greenwoodi</i>     | not present         | narrow-ranged (0.002) | 1 (1)                             | NA                               | NA    | NA     | NA           |
| Eulipotyphla | Soricidae   | <i>Crociodura harena</i>         | not present         | narrow-ranged (0)     | 0 (0)                             | NA                               | NA    | NA     | NA           |
| Eulipotyphla | Soricidae   | <i>Crociodura hildegardeae</i>   | CA                  | narrow-ranged (0.077) | 67 (135)                          | 0.948 (0.91-0.972; 0.937-0.96)   | 0.430 | 0.750  | 59           |
| Eulipotyphla | Soricidae   | <i>Crociodura hirta</i>          | not present         | narrow-ranged (0.133) | 144 (206)                         | 0.92 (0.906-0.941; 0.913-0.928)  | 0.285 | 0.602  | 90           |
| Eulipotyphla | Soricidae   | <i>Crociodura jacksoni</i>       | not present         | narrow-ranged (0.03)  | 19 (29)                           | 0.879 (0.836-0.962; 0.855-0.903) | 0.506 | 0.821  | 30           |
| Eulipotyphla | Soricidae   | <i>Crociodura juvenetae</i>      | WA                  | narrow-ranged (0.007) | 31 (49)                           | 0.986 (0.961-0.997; 0.98-0.993)  | 0.506 | 0.786  | 38           |
| Eulipotyphla | Soricidae   | <i>Crociodura kivuana</i>        | not present         | narrow-ranged (0)     | 4 (10)                            | NA                               | NA    | NA     | NA           |
| Eulipotyphla | Soricidae   | <i>Crociodura lamottei</i>       | WA                  | narrow-ranged (0.051) | 26 (59)                           | 0.824 (0.727-0.896; 0.784-0.864) | 0.432 | 0.763  | 56           |
| Eulipotyphla | Soricidae   | <i>Crociodura lanosa</i>         | not present         | narrow-ranged (0)     | 6 (10)                            | NA                               | NA    | NA     | NA           |
| Eulipotyphla | Soricidae   | <i>Crociodura latona</i>         | CA                  | narrow-ranged (0.005) | 7 (8)                             | NA                               | NA    | NA     | NA           |
| Eulipotyphla | Soricidae   | <i>Crociodura littoralis</i>     | CA                  | narrow-ranged (0.062) | 19 (45)                           | 0.953 (0.773-0.99; 0.91-0.996)   | 0.629 | 0.887  | 14           |
| Eulipotyphla | Soricidae   | <i>Crociodura longipes</i>       | not present         | narrow-ranged (0)     | 1 (1)                             | NA                               | NA    | NA     | NA           |
| Eulipotyphla | Soricidae   | <i>Crociodura lucina</i>         | not present         | narrow-ranged (0)     | 2 (4)                             | NA                               | NA    | NA     | NA           |
| Eulipotyphla | Soricidae   | <i>Crociodura ludia</i>          | CA                  | narrow-ranged (0.016) | 15 (33)                           | 0.873 (0.389-0.974; 0.755-0.991) | 0.543 | 0.837  | 23           |
| Eulipotyphla | Soricidae   | <i>Crociodura luna</i>           | not present         | narrow-ranged (0.06)  | 79 (126)                          | 0.928 (0.9-0.953; 0.917-0.939)   | 0.424 | 0.754  | 60           |
| Eulipotyphla | Soricidae   | <i>Crociodura lusitania</i>      | not present         | narrow-ranged (0.067) | 3 (3)                             | NA                               | NA    | NA     | NA           |
| Eulipotyphla | Soricidae   | <i>Crociodura lwiroensis</i>     | not present         | narrow-ranged (0)     | 2 (2)                             | NA                               | NA    | NA     | NA           |
| Eulipotyphla | Soricidae   | <i>Crociodura macarthurii</i>    | not present         | narrow-ranged (0.015) | 2 (2)                             | NA                               | NA    | NA     | NA           |
| Eulipotyphla | Soricidae   | <i>Crociodura macmillani</i>     | not present         | narrow-ranged (0.001) | 1 (1)                             | NA                               | NA    | NA     | NA           |
| Eulipotyphla | Soricidae   | <i>Crociodura macowi</i>         | not present         | narrow-ranged (0)     | 0 (0)                             | NA                               | NA    | NA     | NA           |
| Eulipotyphla | Soricidae   | <i>Crociodura manengubae</i>     | WA                  | narrow-ranged (0)     | 0 (0)                             | NA                               | NA    | NA     | NA           |
| Eulipotyphla | Soricidae   | <i>Crociodura maquassiensis</i>  | not present         | narrow-ranged (0.011) | 1 (1)                             | NA                               | NA    | NA     | NA           |
| Eulipotyphla | Soricidae   | <i>Crociodura mariquensis</i>    | not present         | narrow-ranged (0.068) | 28 (40)                           | 0.92 (0.867-0.963; 0.9-0.941)    | 0.319 | 0.656  | 84           |
| Eulipotyphla | Soricidae   | <i>Crociodura maurisca</i>       | CA                  | narrow-ranged (0.019) | 15 (18)                           | 0.861 (0.765-0.996; 0.801-0.922) | 0.402 | 0.743  | 68           |
| Eulipotyphla | Soricidae   | <i>Crociodura mdumai</i>         | not present         | narrow-ranged (0)     | 1 (2)                             | NA                               | NA    | NA     | NA           |
| Eulipotyphla | Soricidae   | <i>Crociodura monax</i>          | not present         | narrow-ranged (0)     | 5 (8)                             | NA                               | NA    | NA     | NA           |
| Eulipotyphla | Soricidae   | <i>Crociodura montis</i>         | not present         | narrow-ranged (0.001) | 13 (28)                           | NA                               | NA    | NA     | NA           |
| Eulipotyphla | Soricidae   | <i>Crociodura munissii</i>       | not present         | narrow-ranged (0.001) | 7 (18)                            | NA                               | NA    | NA     | NA           |
| Eulipotyphla | Soricidae   | <i>Crociodura muricauda</i>      | WA                  | narrow-ranged (0.013) | 24 (48)                           | 0.991 (0.982-0.997; 0.988-0.994) | 0.533 | 0.834  | 26           |
| Eulipotyphla | Soricidae   | <i>Crociodura mutesae</i>        | CA                  | narrow-ranged (0.001) | 4 (4)                             | NA                               | NA    | NA     | NA           |
| Eulipotyphla | Soricidae   | <i>Crociodura nana</i>           | not present         | narrow-ranged (0)     | 1 (2)                             | NA                               | NA    | NA     | NA           |
| Eulipotyphla | Soricidae   | <i>Crociodura nanilla</i>        | not present         | narrow-ranged (0.025) | 3 (4)                             | NA                               | NA    | NA     | NA           |
| Eulipotyphla | Soricidae   | <i>Crociodura newmarki</i>       | not present         | narrow-ranged (0)     | 1 (5)                             | NA                               | NA    | NA     | NA           |
| Eulipotyphla | Soricidae   | <i>Crociodura nigeriae</i>       | WA                  | narrow-ranged (0.007) | 13 (14)                           | NA                               | NA    | NA     | NA           |
| Eulipotyphla | Soricidae   | <i>Crociodura nigricans</i>      | not present         | narrow-ranged (0.004) | 0 (0)                             | NA                               | NA    | NA     | NA           |
| Eulipotyphla | Soricidae   | <i>Crociodura nigrofusca</i>     | not present         | narrow-ranged (0.125) | 32 (54)                           | 0.859 (0.752-0.932; 0.819-0.9)   | 0.367 | 0.695  | 79           |
| Eulipotyphla | Soricidae   | <i>Crociodura nimbae</i>         | WA                  | narrow-ranged (0.001) | 8 (9)                             | NA                               | NA    | NA     | NA           |

|               |                 |                                    |             |                       |            |                                  |       |       |    |
|---------------|-----------------|------------------------------------|-------------|-----------------------|------------|----------------------------------|-------|-------|----|
| Eulipotyphla  | Soricidae       | <i>Crocidura nimbasilvanus</i>     | WA          | narrow-ranged (0.002) | 6 (7)      | NA                               | NA    | NA    | NA |
| Eulipotyphla  | Soricidae       | <i>Crocidura niobe</i>             | not present | narrow-ranged (0.001) | 11 (25)    | NA                               | NA    | NA    | NA |
| Eulipotyphla  | Soricidae       | <i>Crocidura obscurior</i>         | WA          | narrow-ranged (0.012) | 28 (68)    | 0.995 (0.983-1; 0.992-0.998)     | 0.489 | 0.789 | 39 |
| Eulipotyphla  | Soricidae       | <i>Crocidura olivieri</i>          | CA + WA     | widespread (0.521)    | 421 (790)  | 0.897 (0.876-0.915; 0.89-0.904)  | 0.654 | 0.908 | 9  |
| Eulipotyphla  | Soricidae       | <i>Crocidura parvipes</i>          | CA          | narrow-ranged (0.184) | 17 (36)    | 0.793 (0.587-0.98; 0.704-0.882)  | 0.408 | 0.745 | 67 |
| Eulipotyphla  | Soricidae       | <i>Crocidura pasha</i>             | not present | narrow-ranged (0.018) | 0 (0)      | NA                               | NA    | NA    | NA |
| Eulipotyphla  | Soricidae       | <i>Crocidura phaeura</i>           | not present | narrow-ranged (0)     | 1 (2)      | NA                               | NA    | NA    | NA |
| Eulipotyphla  | Soricidae       | <i>Crocidura picea</i>             | WA          | narrow-ranged (0)     | 0 (0)      | NA                               | NA    | NA    | NA |
| Eulipotyphla  | Soricidae       | <i>Crocidura pitmani</i>           | not present | narrow-ranged (0.001) | 0 (0)      | NA                               | NA    | NA    | NA |
| Eulipotyphla  | Soricidae       | <i>Crocidura planiceps</i>         | not present | narrow-ranged (0)     | 1 (1)      | NA                               | NA    | NA    | NA |
| Eulipotyphla  | Soricidae       | <i>Crocidura poensis</i>           | WA          | narrow-ranged (0.036) | 54 (79)    | 0.977 (0.963-0.985; 0.973-0.982) | 0.500 | 0.797 | 36 |
| Eulipotyphla  | Soricidae       | <i>Crocidura polia</i>             | CA          | narrow-ranged (0)     | 0 (0)      | NA                               | NA    | NA    | NA |
| Eulipotyphla  | Soricidae       | <i>Crocidura raineyi</i>           | not present | narrow-ranged (0)     | 1 (1)      | NA                               | NA    | NA    | NA |
| Eulipotyphla  | Soricidae       | <i>Crocidura roosevelti</i>        | not present | narrow-ranged (0.065) | 0 (0)      | NA                               | NA    | NA    | NA |
| Eulipotyphla  | Soricidae       | <i>Crocidura selina</i>            | not present | narrow-ranged (0.001) | 3 (5)      | NA                               | NA    | NA    | NA |
| Eulipotyphla  | Soricidae       | <i>Crocidura silacea</i>           | not present | narrow-ranged (0.011) | 6 (6)      | NA                               | NA    | NA    | NA |
| Eulipotyphla  | Soricidae       | <i>Crocidura smithii</i>           | not present | narrow-ranged (0.006) | 0 (0)      | NA                               | NA    | NA    | NA |
| Eulipotyphla  | Soricidae       | <i>Crocidura somalica</i>          | not present | narrow-ranged (0.006) | 0 (0)      | NA                               | NA    | NA    | NA |
| Eulipotyphla  | Soricidae       | <i>Crocidura stenocephala</i>      | not present | narrow-ranged (0)     | 3 (6)      | NA                               | NA    | NA    | NA |
| Eulipotyphla  | Soricidae       | <i>Crocidura tansaniana</i>        | not present | narrow-ranged (0)     | 2 (10)     | NA                               | NA    | NA    | NA |
| Eulipotyphla  | Soricidae       | <i>Crocidura tarella</i>           | not present | narrow-ranged (0)     | 1 (1)      | NA                               | NA    | NA    | NA |
| Eulipotyphla  | Soricidae       | <i>Crocidura tarfayensis</i>       | not present | narrow-ranged (0.009) | 5 (5)      | NA                               | NA    | NA    | NA |
| Eulipotyphla  | Soricidae       | <i>Crocidura telfordi</i>          | not present | narrow-ranged (0)     | 4 (11)     | NA                               | NA    | NA    | NA |
| Eulipotyphla  | Soricidae       | <i>Crocidura thalia</i>            | not present | narrow-ranged (0.005) | 9 (21)     | NA                               | NA    | NA    | NA |
| Eulipotyphla  | Soricidae       | <i>Crocidura theresae</i>          | WA          | narrow-ranged (0.009) | 40 (64)    | 0.966 (0.95-0.992; 0.957-0.975)  | 0.652 | 0.907 | 10 |
| Eulipotyphla  | Soricidae       | <i>Crocidura thomensis</i>         | not present | narrow-ranged (0)     | 4 (4)      | NA                               | NA    | NA    | NA |
| Eulipotyphla  | Soricidae       | <i>Crocidura turba</i>             | CA          | narrow-ranged (0.16)  | 64 (118)   | 0.855 (0.799-0.931; 0.83-0.88)   | 0.437 | 0.763 | 54 |
| Eulipotyphla  | Soricidae       | <i>Crocidura ultima</i>            | not present | narrow-ranged (0)     | 0 (0)      | NA                               | NA    | NA    | NA |
| Eulipotyphla  | Soricidae       | <i>Crocidura usambarae</i>         | not present | narrow-ranged (0)     | 6 (13)     | NA                               | NA    | NA    | NA |
| Eulipotyphla  | Soricidae       | <i>Crocidura viaria</i>            | not present | widespread (0.27)     | 17 (20)    | NA                               | NA    | NA    | NA |
| Eulipotyphla  | Soricidae       | <i>Crocidura virgata</i>           | WA          | narrow-ranged (0)     | 0 (0)      | NA                               | NA    | NA    | NA |
| Eulipotyphla  | Soricidae       | <i>Crocidura voi</i>               | not present | narrow-ranged (0.099) | 2 (3)      | NA                               | NA    | NA    | NA |
| Eulipotyphla  | Soricidae       | <i>Crocidura wimmeri</i>           | WA          | narrow-ranged (0)     | 3 (3)      | NA                               | NA    | NA    | NA |
| Eulipotyphla  | Soricidae       | <i>Crocidura xantippe</i>          | not present | narrow-ranged (0.001) | 2 (3)      | NA                               | NA    | NA    | NA |
| Eulipotyphla  | Soricidae       | <i>Crocidura yaldeni</i>           | not present | narrow-ranged (0)     | 1 (1)      | NA                               | NA    | NA    | NA |
| Eulipotyphla  | Soricidae       | <i>Crocidura yankariensis</i>      | not present | narrow-ranged (0.046) | 1 (1)      | NA                               | NA    | NA    | NA |
| Eulipotyphla  | Soricidae       | <i>Crocidura zaphiri</i>           | not present | narrow-ranged (0)     | 0 (0)      | NA                               | NA    | NA    | NA |
| Eulipotyphla  | Soricidae       | <i>Crocidura zimmeri</i>           | not present | narrow-ranged (0)     | 1 (2)      | NA                               | NA    | NA    | NA |
| Macroscelidea | Macroscelididae | <i>Petrodromus tetradactylus</i>   | CA          | narrow-ranged (0.103) | 88 (170)   | 0.925 (0.908-0.945; 0.917-0.934) | 0.382 | 0.706 | 75 |
| Primate       | Cercopithecidae | <i>Allenopithecus nigroviridis</i> | CA          | narrow-ranged (0.005) | 5 (8)      | NA                               | NA    | NA    | NA |
| Primate       | Cercopithecidae | <i>Cercocebus agilis</i>           | CA          | narrow-ranged (0.033) | 18 (42)    | 0.927 (0.824-0.981; 0.897-0.957) | 0.563 | 0.857 | 21 |
| Primate       | Cercopithecidae | <i>Cercocebus atys</i>             | WA          | narrow-ranged (0.01)  | 28 (81)    | 0.959 (0.916-0.991; 0.945-0.974) | 0.437 | 0.754 | 58 |
| Primate       | Cercopithecidae | <i>Cercocebus chrysogaster</i>     | CA          | narrow-ranged (0.003) | 1 (1)      | NA                               | NA    | NA    | NA |
| Primate       | Cercopithecidae | <i>Cercocebus galeritus</i>        | not present | narrow-ranged (0)     | 4 (28)     | NA                               | NA    | NA    | NA |
| Primate       | Cercopithecidae | <i>Cercocebus lunulatus</i>        | WA          | narrow-ranged (0.005) | 3 (5)      | NA                               | NA    | NA    | NA |
| Primate       | Cercopithecidae | <i>Cercocebus sanjei</i>           | not present | narrow-ranged (0)     | 5 (12)     | NA                               | NA    | NA    | NA |
| Primate       | Cercopithecidae | <i>Cercocebus torquatus</i>        | CA + WA     | narrow-ranged (0.009) | 32 (51)    | 0.978 (0.961-0.993; 0.972-0.984) | 0.427 | 0.736 | 64 |
| Primate       | Cercopithecidae | <i>Cercopithecus ascanius</i>      | CA          | narrow-ranged (0.086) | 149 (688)  | 0.956 (0.929-0.976; 0.947-0.965) | 0.653 | 0.897 | 11 |
| Primate       | Cercopithecidae | <i>Cercopithecus campbelli</i>     | WA          | narrow-ranged (0.01)  | 50 (89)    | 0.989 (0.982-0.996; 0.986-0.992) | 0.531 | 0.791 | 31 |
| Primate       | Cercopithecidae | <i>Cercopithecus cephus</i>        | CA          | narrow-ranged (0.027) | 63 (123)   | 0.986 (0.981-0.994; 0.984-0.989) | 0.424 | 0.683 | 74 |
| Primate       | Cercopithecidae | <i>Cercopithecus denti</i>         | CA          | narrow-ranged (0.013) | 13 (25)    | NA                               | NA    | NA    | NA |
| Primate       | Cercopithecidae | <i>Cercopithecus diana</i>         | WA          | narrow-ranged (0.007) | 40 (153)   | 0.988 (0.941-0.997; 0.977-0.998) | 0.502 | 0.807 | 35 |
| Primate       | Cercopithecidae | <i>Cercopithecus dryas</i>         | CA          | narrow-ranged (0)     | 4 (8)      | NA                               | NA    | NA    | NA |
| Primate       | Cercopithecidae | <i>Cercopithecus erythrogaster</i> | WA          | narrow-ranged (0.002) | 33 (69)    | 0.99 (0.971-0.997; 0.984-0.995)  | 0.411 | 0.733 | 69 |
| Primate       | Cercopithecidae | <i>Cercopithecus erythrotis</i>    | CA + WA     | narrow-ranged (0.002) | 20 (34)    | 0.994 (0.984-0.999; 0.991-0.996) | 0.417 | 0.723 | 71 |
| Primate       | Cercopithecidae | <i>Cercopithecus hamlyni</i>       | CA          | narrow-ranged (0.007) | 8 (8)      | NA                               | NA    | NA    | NA |
| Primate       | Cercopithecidae | <i>Cercopithecus lomamiensis</i>   | CA          | narrow-ranged (0.001) | 3 (6)      | NA                               | NA    | NA    | NA |
| Primate       | Cercopithecidae | <i>Cercopithecus lowei</i>         | WA          | narrow-ranged (0.009) | 36 (89)    | 0.976 (0.869-0.996; 0.953-1)     | 0.361 | 0.655 | 82 |
| Primate       | Cercopithecidae | <i>Cercopithecus mitis</i>         | CA          | narrow-ranged (0.088) | 453 (2228) | 0.951 (0.943-0.958; 0.947-0.954) | 0.510 | 0.803 | 34 |
| Primate       | Cercopithecidae | <i>Cercopithecus mona</i>          | WA          | narrow-ranged (0.021) | 98 (201)   | 0.988 (0.982-0.995; 0.986-0.99)  | 0.384 | 0.689 | 77 |
| Primate       | Cercopithecidae | <i>Cercopithecus neglectus</i>     | CA          | narrow-ranged (0.075) | 48 (110)   | 0.927 (0.856-0.967; 0.904-0.95)  | 0.641 | 0.890 | 12 |
| Primate       | Cercopithecidae | <i>Cercopithecus nictitans</i>     | CA + WA     | narrow-ranged (0.044) | 121 (210)  | 0.974 (0.964-0.983; 0.97-0.978)  | 0.630 | 0.852 | 18 |
| Primate       | Cercopithecidae | <i>Cercopithecus petaurista</i>    | WA          | narrow-ranged (0.018) | 77 (111)   | 0.982 (0.963-0.991; 0.977-0.987) | 0.588 | 0.831 | 22 |
| Primate       | Cercopithecidae | <i>Cercopithecus pogonias</i>      | CA + WA     | narrow-ranged (0.036) | 48 (70)    | 0.972 (0.958-0.981; 0.967-0.977) | 0.563 | 0.807 | 25 |
| Primate       | Cercopithecidae | <i>Cercopithecus rolaway</i>       | WA          | narrow-ranged (0)     | 5 (5)      | NA                               | NA    | NA    | NA |
| Primate       | Cercopithecidae | <i>Cercopithecus sclateri</i>      | WA          | narrow-ranged (0.001) | 8 (13)     | NA                               | NA    | NA    | NA |
| Primate       | Cercopithecidae | <i>Cercopithecus wolfe</i>         | CA          | narrow-ranged (0.023) | 24 (35)    | 0.956 (0.736-0.993; 0.907-1)     | 0.472 | 0.795 | 42 |
| Primate       | Cercopithecidae | <i>Chlorocebus aethiops</i>        | not present | narrow-ranged (0.038) | 75 (264)   | 0.943 (0.915-0.969; 0.932-0.953) | 0.373 | 0.701 | 76 |
| Primate       | Cercopithecidae | <i>Chlorocebus cynosuros</i>       | CA          | narrow-ranged (0.101) | 56 (157)   | 0.928 (0.868-0.974; 0.908-0.948) | 0.253 | 0.563 | 93 |
| Primate       | Cercopithecidae | <i>Chlorocebus djamdjamensis</i>   | not present | narrow-ranged (0)     | 10 (33)    | NA                               | NA    | NA    | NA |
| Primate       | Cercopithecidae | <i>Chlorocebus pygerythrus</i>     | not present | narrow-ranged (0.153) | 990 (6184) | 0.925 (0.918-0.93; 0.922-0.928)  | 0.373 | 0.693 | 78 |
| Primate       | Cercopithecidae | <i>Chlorocebus sabaeus</i>         | WA          | narrow-ranged (0.047) | 84 (729)   | 0.975 (0.96-0.986; 0.97-0.98)    | 0.310 | 0.617 | 87 |
| Primate       | Cercopithecidae | <i>Chlorocebus tantalus</i>        | CA + WA     | narrow-ranged (0.13)  | 143 (560)  | 0.906 (0.823-0.946; 0.882-0.93)  | 0.450 | 0.764 | 51 |
| Primate       | Cercopithecidae | <i>Ptilocolobus badius</i>         | WA          | narrow-ranged (0.011) | 70 (261)   | 0.986 (0.976-0.993; 0.983-0.989) | 0.434 | 0.729 | 63 |
| Primate       | Cercopithecidae | <i>Ptilocolobus bouvieri</i>       | CA          | narrow-ranged (0.001) | 1 (1)      | NA                               | NA    | NA    | NA |
| Primate       | Cercopithecidae | <i>Ptilocolobus epieni</i>         | WA          | narrow-ranged (0)     | 0 (0)      | NA                               | NA    | NA    | NA |
| Primate       | Cercopithecidae | <i>Ptilocolobus foai</i>           | not present | narrow-ranged (0)     | 1 (1)      | NA                               | NA    | NA    | NA |
| Primate       | Cercopithecidae | <i>Ptilocolobus gordonorum</i>     | not present | narrow-ranged (0)     | 10 (27)    | NA                               | NA    | NA    | NA |



|          |                 |                                   |             |                       |            |                                  |       |       |    |
|----------|-----------------|-----------------------------------|-------------|-----------------------|------------|----------------------------------|-------|-------|----|
| Primate  | Cercopithecidae | <i>Ptilocolobus kirkii</i>        | not present | narrow-ranged (0)     | 15 (318)   | NA                               | NA    | NA    | NA |
| Primate  | Cercopithecidae | <i>Ptilocolobus langi</i>         | CA          | narrow-ranged (0.002) | 1 (1)      | NA                               | NA    | NA    | NA |
| Primate  | Cercopithecidae | <i>Ptilocolobus lulindicus</i>    | CA          | narrow-ranged (0.003) | 0 (0)      | NA                               | NA    | NA    | NA |
| Primate  | Cercopithecidae | <i>Ptilocolobus oustaleti</i>     | CA          | narrow-ranged (0.014) | 10 (14)    | NA                               | NA    | NA    | NA |
| Primate  | Cercopithecidae | <i>Ptilocolobus parmentieri</i>   | CA          | narrow-ranged (0.001) | 2 (3)      | NA                               | NA    | NA    | NA |
| Primate  | Cercopithecidae | <i>Ptilocolobus pennantii</i>     | not present | narrow-ranged (0)     | 2 (5)      | NA                               | NA    | NA    | NA |
| Primate  | Cercopithecidae | <i>Ptilocolobus preussi</i>       | WA          | narrow-ranged (0)     | 1 (1)      | NA                               | NA    | NA    | NA |
| Primate  | Cercopithecidae | <i>Ptilocolobus rufomitatus</i>   | not present | narrow-ranged (0)     | 6 (22)     | NA                               | NA    | NA    | NA |
| Primate  | Cercopithecidae | <i>Ptilocolobus semlikiensis</i>  | CA          | narrow-ranged (0.002) | 3 (3)      | NA                               | NA    | NA    | NA |
| Primate  | Cercopithecidae | <i>Ptilocolobus tephrosceles</i>  | not present | narrow-ranged (0)     | 27 (181)   | 0.885 (0.62-0.997; 0.8-0.969)    | 0.355 | 0.687 | 81 |
| Primate  | Cercopithecidae | <i>Ptilocolobus tholloni</i>      | CA          | narrow-ranged (0.016) | 8 (15)     | NA                               | NA    | NA    | NA |
| Primate  | Hominidae       | <i>Pan paniscus</i>               | CA          | narrow-ranged (0.014) | 8 (8)      | NA                               | NA    | NA    | NA |
| Primate  | Hominidae       | <i>Pan troglodytes</i>            | CA + WA     | narrow-ranged (0.076) | 205 (1302) | 0.948 (0.93-0.96; 0.943-0.954)   | 0.669 | 0.912 | 7  |
| Primate  | Lorisidae       | <i>Perodicticus edwardsi</i>      | CA + WA     | narrow-ranged (0.08)  | 41 (55)    | 0.968 (0.959-0.977; 0.964-0.972) | 0.605 | 0.844 | 19 |
| Primate  | Lorisidae       | <i>Perodicticus ibeanus</i>       | CA          | narrow-ranged (0.028) | 24 (36)    | 0.818 (0.686-0.951; 0.761-0.875) | 0.407 | 0.732 | 70 |
| Primate  | Lorisidae       | <i>Perodicticus potto</i>         | WA          | narrow-ranged (0.022) | 53 (90)    | 0.983 (0.978-0.988; 0.98-0.985)  | 0.431 | 0.726 | 66 |
| Rodentia | Dipodidae       | <i>Jaculus jaculus</i>            | not present | widespread (0.267)    | 297 (587)  | 0.922 (0.908-0.934; 0.916-0.927) | 0.127 | 0.364 | 98 |
| Rodentia | Gliridae        | <i>Graphiurus angolensis</i>      | not present | narrow-ranged (0.007) | 0 (0)      | NA                               | NA    | NA    | NA |
| Rodentia | Gliridae        | <i>Graphiurus christyi</i>        | CA          | narrow-ranged (0.013) | 28 (31)    | 0.954 (0.881-0.992; 0.929-0.979) | 0.479 | 0.792 | 40 |
| Rodentia | Gliridae        | <i>Graphiurus crassicaudatus</i>  | WA          | narrow-ranged (0.017) | 32 (43)    | 0.974 (0.926-0.997; 0.958-0.99)  | 0.423 | 0.744 | 62 |
| Rodentia | Gliridae        | <i>Graphiurus johnstoni</i>       | not present | narrow-ranged (0)     | 0 (0)      | NA                               | NA    | NA    | NA |
| Rodentia | Gliridae        | <i>Graphiurus kelleni</i>         | WA          | narrow-ranged (0.091) | 28 (36)    | 0.802 (0.734-0.898; 0.77-0.833)  | 0.500 | 0.814 | 33 |
| Rodentia | Gliridae        | <i>Graphiurus lorrainae</i>       | CA + WA     | narrow-ranged (0.114) | 47 (51)    | 0.926 (0.888-0.955; 0.913-0.939) | 0.727 | 0.917 | 2  |
| Rodentia | Gliridae        | <i>Graphiurus microtis</i>        | not present | narrow-ranged (0.109) | 52 (76)    | 0.874 (0.758-0.928; 0.84-0.908)  | 0.363 | 0.685 | 80 |
| Rodentia | Gliridae        | <i>Graphiurus monardi</i>         | not present | narrow-ranged (0.001) | 0 (0)      | NA                               | NA    | NA    | NA |
| Rodentia | Gliridae        | <i>Graphiurus murinus</i>         | not present | narrow-ranged (0.032) | 163 (319)  | 0.959 (0.931-0.977; 0.95-0.967)  | 0.390 | 0.720 | 73 |
| Rodentia | Gliridae        | <i>Graphiurus nagtglasii</i>      | CA + WA     | narrow-ranged (0.029) | 40 (52)    | 0.976 (0.945-0.991; 0.968-0.984) | 0.540 | 0.822 | 28 |
| Rodentia | Gliridae        | <i>Graphiurus ocularis</i>        | not present | narrow-ranged (0.011) | 17 (29)    | 0.995 (0.978-1; 0.991-0.999)     | 0.127 | 0.302 | 99 |
| Rodentia | Gliridae        | <i>Graphiurus platyops</i>        | not present | narrow-ranged (0.011) | 1 (1)      | NA                               | NA    | NA    | NA |
| Rodentia | Gliridae        | <i>Graphiurus rupicola</i>        | not present | narrow-ranged (0.002) | 1 (1)      | NA                               | NA    | NA    | NA |
| Rodentia | Gliridae        | <i>Graphiurus surdus</i>          | CA          | narrow-ranged (0.002) | 1 (1)      | NA                               | NA    | NA    | NA |
| Rodentia | Gliridae        | <i>Graphiurus walterverheyeni</i> | CA          | narrow-ranged (0.003) | 0 (0)      | NA                               | NA    | NA    | NA |
| Rodentia | Muridae         | <i>Malacomys cansdalei</i>        | WA          | narrow-ranged (0.006) | 17 (32)    | 0.954 (0.903-0.979; 0.939-0.969) | 0.474 | 0.791 | 44 |
| Rodentia | Muridae         | <i>Malacomys edwardsi</i>         | WA          | narrow-ranged (0.016) | 72 (120)   | 0.988 (0.976-0.993; 0.985-0.991) | 0.615 | 0.886 | 15 |
| Rodentia | Muridae         | <i>Malacomys longipes</i>         | CA + WA     | narrow-ranged (0.04)  | 127 (196)  | 0.965 (0.937-0.975; 0.958-0.971) | 0.685 | 0.902 | 6  |
| Rodentia | Muridae         | <i>Oenomys hypoxanthus</i>        | CA + WA     | narrow-ranged (0.137) | 248 (395)  | 0.944 (0.927-0.958; 0.938-0.95)  | 0.668 | 0.904 | 8  |
| Rodentia | Muridae         | <i>Oenomys ornatus</i>            | WA          | narrow-ranged (0.005) | 5 (7)      | NA                               | NA    | NA    | NA |
| Rodentia | Muridae         | <i>Stochomys longicaudatus</i>    | CA + WA     | narrow-ranged (0.061) | 122 (162)  | 0.957 (0.939-0.971; 0.951-0.963) | 0.698 | 0.921 | 5  |
| Rodentia | Nesomyidae      | <i>Cricetomys ansorgei</i>        | CA          | narrow-ranged (0.188) | 94 (132)   | 0.926 (0.908-0.953; 0.917-0.934) | 0.470 | 0.766 | 47 |
| Rodentia | Nesomyidae      | <i>Cricetomys emini</i>           | CA + WA     | narrow-ranged (0.123) | 134 (193)  | 0.964 (0.952-0.974; 0.96-0.968)  | 0.627 | 0.864 | 17 |
| Rodentia | Nesomyidae      | <i>Cricetomys gambianus</i>       | WA          | narrow-ranged (0.136) | 229 (533)  | 0.941 (0.925-0.953; 0.935-0.947) | 0.564 | 0.856 | 20 |
| Rodentia | Sciuridae       | <i>Funisciurus anerythrus</i>     | CA + WA     | narrow-ranged (0.075) | 112 (142)  | 0.952 (0.93-0.973; 0.945-0.96)   | 0.746 | 0.931 | 1  |
| Rodentia | Sciuridae       | <i>Funisciurus bayonii</i>        | not present | narrow-ranged (0.013) | 9 (13)     | NA                               | NA    | NA    | NA |
| Rodentia | Sciuridae       | <i>Funisciurus carruthersi</i>    | not present | narrow-ranged (0.003) | 53 (106)   | 0.967 (0.93-0.997; 0.955-0.98)   | 0.300 | 0.633 | 86 |
| Rodentia | Sciuridae       | <i>Funisciurus congicus</i>       | CA          | narrow-ranged (0.057) | 92 (152)   | 0.884 (0.843-0.91; 0.871-0.898)  | 0.516 | 0.824 | 29 |
| Rodentia | Sciuridae       | <i>Funisciurus duchaillui</i>     | CA          | narrow-ranged (0)     | 0 (0)      | NA                               | NA    | NA    | NA |
| Rodentia | Sciuridae       | <i>Funisciurus isabella</i>       | CA + WA     | narrow-ranged (0.019) | 24 (42)    | 0.952 (0.914-0.983; 0.936-0.967) | 0.541 | 0.837 | 24 |
| Rodentia | Sciuridae       | <i>Funisciurus lemniscatus</i>    | CA          | narrow-ranged (0.02)  | 37 (52)    | 0.976 (0.943-0.989; 0.968-0.984) | 0.458 | 0.735 | 57 |
| Rodentia | Sciuridae       | <i>Funisciurus leucogenys</i>     | CA + WA     | narrow-ranged (0.014) | 49 (93)    | 0.983 (0.946-0.993; 0.975-0.992) | 0.487 | 0.765 | 45 |
| Rodentia | Sciuridae       | <i>Funisciurus pyrrhopus</i>      | CA + WA     | narrow-ranged (0.071) | 159 (207)  | 0.95 (0.925-0.973; 0.941-0.958)  | 0.719 | 0.918 | 3  |
| Rodentia | Sciuridae       | <i>Funisciurus substriatus</i>    | WA          | narrow-ranged (0.007) | 28 (56)    | 0.925 (0.852-0.989; 0.893-0.957) | 0.438 | 0.759 | 55 |
| Rodentia | Sciuridae       | <i>Heliosciurus gambianus</i>     | WA          | narrow-ranged (0.155) | 212 (549)  | 0.898 (0.884-0.911; 0.893-0.902) | 0.430 | 0.728 | 65 |
| Rodentia | Sciuridae       | <i>Heliosciurus mutabilis</i>     | not present | narrow-ranged (0.035) | 52 (122)   | 0.938 (0.809-0.993; 0.896-0.98)  | 0.214 | 0.510 | 95 |
| Rodentia | Sciuridae       | <i>Heliosciurus punctatus</i>     | WA          | narrow-ranged (0.011) | 26 (43)    | 0.994 (0.984-0.998; 0.991-0.996) | 0.465 | 0.762 | 48 |
| Rodentia | Sciuridae       | <i>Heliosciurus rufobrachium</i>  | CA + WA     | narrow-ranged (0.097) | 306 (469)  | 0.948 (0.938-0.961; 0.943-0.952) | 0.705 | 0.915 | 4  |
| Rodentia | Sciuridae       | <i>Heliosciurus ruwenzorii</i>    | not present | narrow-ranged (0.005) | 47 (89)    | 0.928 (0.828-0.979; 0.899-0.957) | 0.318 | 0.654 | 85 |
| Rodentia | Sciuridae       | <i>Heliosciurus undulatus</i>     | not present | narrow-ranged (0.004) | 28 (112)   | 0.995 (0.987-0.998; 0.993-0.997) | 0.300 | 0.591 | 88 |
| Rodentia | Sciuridae       | <i>Xerus erythropus</i>           | CA + WA     | widespread (0.29)     | 413 (771)  | 0.911 (0.895-0.924; 0.905-0.917) | 0.456 | 0.754 | 53 |
| Rodentia | Sciuridae       | <i>Xerus inauris</i>              | not present | narrow-ranged (0.05)  | 350 (842)  | 0.968 (0.957-0.975; 0.964-0.972) | 0.203 | 0.484 | 96 |
| Rodentia | Sciuridae       | <i>Xerus princeps</i>             | not present | narrow-ranged (0.008) | 23 (39)    | 0.908 (0.856-0.987; 0.884-0.933) | 0.266 | 0.577 | 92 |
| Rodentia | Sciuridae       | <i>Xerus rutilus</i>              | not present | narrow-ranged (0.051) | 141 (332)  | 0.971 (0.952-0.984; 0.964-0.978) | 0.250 | 0.524 | 94 |

Abbreviations: AUC: area under the curve; CI: Confidence interval; D: Schoener's D; I: Hellinger's I; CA: Central African rainforests; WA: West African rainforests; NA: not applicable

**Table S2: Geographic coordinates of the 109 occurrence records used for the MPXV niche.**

| Year | Human/Animal | Location               | Country       | Latitude | Longitude |
|------|--------------|------------------------|---------------|----------|-----------|
| 1987 | Human        | 70km of Lambarené      | Gabon         | -0.31    | 10.46     |
| 2016 | Human        | Rehou 4                | CAR           | 5.47     | 21.84     |
| 1970 | Human        | Bokenda                | DRC           | 0.96     | 20.22     |
| 1970 | Human        | Boudua                 | Liberia       | 6.19     | -7.98     |
| 1970 | Human        | Taa                    | Liberia       | 6.25     | -8.03     |
| 1970 | Human        | Aguebu                 | Sierra Leone  | 8.20     | -12.40    |
| 1971 | Human        | Bossematié (Bosmatché) | Côte d'Ivoire | 6.61     | -3.44     |
| 1971 | Human        | Ihie Umuduru           | Nigeria       | 5.02     | 7.31      |
| 1972 | Human        | Libela                 | DRC           | 2.63     | 22.19     |
| 1972 | Human        | Bokokolo (Bokokole)    | DRC           | 0.70     | 22.42     |
| 1973 | Human        | Bogon                  | DRC           | 2.91     | 19.69     |
| 1973 | Human        | Bombana                | DRC           | 2.77     | 21.81     |
| 1974 | Human        | Bumba                  | DRC           | 2.19     | 22.47     |
| 1975 | Human        | Iba                    | DRC           | -2.43    | 17.78     |
| 1975 | Human        | Djungula               | DRC           | -3.27    | 22.39     |
| 1976 | Human        | Ebata                  | DRC           | 2.50     | 21.74     |
| 1976 | Human        | Yamgomba               | DRC           | 2.34     | 22.30     |
| 1976 | Human        | Masina                 | DRC           | -5.86    | 17.05     |
| 1977 | Human        | Yamagbe-Bohumbe        | DRC           | 2.61     | 21.85     |
| 1977 | Human        | Iwadj                  | DRC           | -3.13    | 22.20     |
| 1977 | Human        | Bwalayulu              | DRC           | -4.52    | 17.99     |
| 1977 | Human        | Selebo II (Katanti)    | DRC           | -2.27    | 27.10     |
| 1978 | Human        | Mwanzita               | DRC           | -7.10    | 17.89     |
| 1978 | Human        | Ikela                  | DRC           | -1.05    | 23.36     |
| 1978 | Human        | Mongo Senge            | DRC           | -3.40    | 22.37     |
| 1978 | Human        | Imbimbi                | DRC           | -4.70    | 19.36     |
| 1978 | Human        | Okela                  | DRC           | -3.64    | 22.18     |
| 1978 | Human        | Ekodji                 | DRC           | -3.59    | 22.22     |
| 1978 | Human        | Mindembo               | DRC           | 2.44     | 21.98     |
| 1978 | Human        | Yaliengo               | DRC           | 2.38     | 21.89     |
| 1978 | Human        | Apoko                  | DRC           | -3.32    | 22.64     |
| 1978 | Human        | Omifunfun              | Nigeria       | 7.16     | 4.60      |
| 1979 | Human        | Ekidmékoé              | Cameroon      | 3.63     | 11.65     |
| 1979 | Human        | Bosokuma               | DRC           | 1.81     | 20.60     |
| 1979 | Human        | Olonga                 | DRC           | -3.90    | 22.76     |
| 1980 | Human        | Moloundou              | Cameroon      | 2.03     | 15.22     |

|      |        |                            |                   |       |        |
|------|--------|----------------------------|-------------------|-------|--------|
| 1981 | Human  | Gbétitapéa                 | Côte d'Ivoire     | 6.80  | -6.46  |
| 1982 | Human  | Kikongo (Camp Bulumbu III) | DRC               | -4.98 | 18.77  |
| 1982 | Human  | Kibwe                      | DRC               | -2.22 | 27.12  |
| 1983 | Human  | Iyeke                      | DRC               | -4.00 | 21.30  |
| 1983 | Human  | Idumbe                     | DRC               | -3.93 | 21.55  |
| 1984 | Human  | Lidjombo                   | CAR               | 2.70  | 16.10  |
| 1985 | Animal | Bodjoki (40 km of Yambuku) | DRC               | 2.98  | 22.30  |
| 1986 | Human  | Yandongi                   | DRC               | 2.84  | 22.27  |
| 1986 | Human  | Ikubi                      | DRC               | -4.55 | 19.56  |
| 1989 | Human  | Ekoum-Douma                | Cameroon          | 4.17  | 11.53  |
| 1996 | Human  | Akungula                   | DRC               | -3.26 | 23.98  |
| 1996 | Human  | Ekanga                     | DRC               | -3.34 | 24.21  |
| 1997 | Human  | Ombeka                     | DRC               | -3.40 | 24.05  |
| 2001 | Human  | Abuzi                      | DRC               | 3.69  | 22.15  |
| 2001 | Human  | Boso Mane                  | DRC               | 1.76  | 20.05  |
| 2001 | Human  | En Dongale                 | DRC               | 1.77  | 20.55  |
| 2003 | Human  | Doungou                    | Republic of Congo | 2.05  | 18.05  |
| 2008 | Human  | Boende                     | DRC               | -0.28 | 20.88  |
| 2010 | Human  | Mongoumba                  | CAR               | 3.64  | 18.59  |
| 2010 | Human  | Boyele Port                | Republic of Congo | 2.55  | 18.18  |
| 2010 | Human  | Ebobo                      | Republic of Congo | 3.17  | 18.48  |
| 2011 | Human  | Boboro (Walikale)          | DRC               | -1.33 | 27.97  |
| 2012 | Human  | Mabaka (Shabunda)          | DRC               | -2.93 | 27.13  |
| 2013 | Human  | Bokungu                    | DRC               | -0.60 | 22.32  |
| 2014 | Animal | Sanaga-Yong                | Cameroon          | 4.87  | 13.17  |
| 2014 | Human  | Kpetema                    | Sierra Leone      | 7.75  | -11.63 |
| 2015 | Human  | Lengo                      | CAR               | 5.68  | 22.87  |
| 2015 | Human  | Bria/Koupou 2              | CAR               | 6.75  | 22.00  |
| 2016 | Animal | Mefou Primate Sanctuary    | Cameroon          | 3.62  | 11.58  |
| 2016 | Human  | Bandoufou                  | CAR               | 4.90  | 22.94  |
| 2016 | Human  | Fadama                     | CAR               | 5.73  | 22.76  |
| 2016 | Human  | Bogbengo, Aketi            | DRC               | 2.93  | 23.74  |
| 2017 | Human  | Bao                        | CAR               | 4.44  | 22.35  |
| 2017 | Human  | Café-Machado               | CAR               | 3.83  | 18.04  |
| 2017 | Animal | Taï National Park          | Côte d'Ivoire     | 5.80  | -7.32  |
| 2017 | Animal | Taï National Park          | Côte d'Ivoire     | 5.88  | -7.35  |
| 2017 | Human  | Agbura                     | Nigeria           | 4.85  | 6.27   |
| 2017 | Human  | Moualé                     | Republic of Congo | 3.38  | 17.18  |

|      |        |                               |                   |       |        |
|------|--------|-------------------------------|-------------------|-------|--------|
| 2017 | Human  | Manfoueté                     | Republic of Congo | 2.36  | 17.66  |
| 2017 | Human  | Kpaku                         | Sierra Leone      | 7.37  | -11.63 |
| 2017 | Human  | Tenken                        | Liberia           | 5.01  | -7.86  |
| 2018 | Human  | Bokoka/Bagandou               | CAR               | 3.90  | 17.92  |
| 2018 | Human  | Bakouma                       | CAR               | 5.71  | 22.78  |
| 2018 | Human  | Mbalazimé (Bangassou)         | CAR               | 4.81  | 22.87  |
| 2018 | Human  | Rafaï                         | CAR               | 4.98  | 23.94  |
| 2018 | Human  | Zoméa                         | CAR               | 3.65  | 18.02  |
| 2018 | Human  | Bangassou                     | CAR               | 5.01  | 23.15  |
| 2018 | Human  | Bossebele                     | CAR               | 5.27  | 17.63  |
| 2018 | Animal | Taï National Park             | Côte d'Ivoire     | 5.82  | -7.27  |
| 2019 | Human  | Tomba 1, Ayos Health District | Cameroon          | 4.27  | 12.55  |
| 2019 | Human  | Ouadjimi/Bambari              | CAR               | 5.74  | 21.05  |
| 2019 | Human  | Boda/Géomètre                 | CAR               | 4.31  | 17.47  |
| 2019 | Human  | Loko                          | CAR               | 3.64  | 18.06  |
| 2019 | Human  | Ndolobo                       | CAR               | 3.82  | 17.85  |
| 2019 | Human  | Bomango/Boda                  | CAR               | 4.06  | 17.47  |
| 2019 | Human  | Moloukou                      | CAR               | 3.74  | 17.52  |
| 2019 | Human  | Ngoto                         | CAR               | 4.02  | 17.34  |
| 2019 | Human  | Moboma                        | CAR               | 3.73  | 17.84  |
| 2019 | Human  | Makotipoko, Gambona           | DRC               | -2.00 | 16.32  |
| 2020 | Human  | Bambio / Bounguele            | CAR               | 3.94  | 16.97  |
| 2020 | Human  | Wodo/Nola                     | CAR               | 3.52  | 16.05  |
| 2020 | Human  | Mokongo/Bagandou              | CAR               | 3.93  | 18.27  |
| 2020 | Human  | Combattant                    | CAR               | 5.01  | 23.15  |
| 2020 | Human  | Kembé (Café Bangui)           | CAR               | 4.62  | 21.89  |
| 2021 | Human  | Bagawa (Bria)                 | CAR               | 6.75  | 22.00  |
| 2021 | Human  | Gbodo/Bangassou               | CAR               | 4.32  | 22.55  |
| 2021 | Human  | Massangai/ Bambio             | CAR               | 3.94  | 16.97  |
| 2021 | Human  | Moloukou/Dakota               | CAR               | 3.74  | 17.52  |
| 2021 | Human  | SCED Ndelengue                | CAR               | 3.44  | 16.39  |
| 2021 | Human  | Grima                         | CAR               | 4.08  | 17.07  |
| 2021 | Human  | Bania                         | CAR               | 4.60  | 16.10  |
| 2021 | Human  | Nazembe                       | CAR               | 4.16  | 15.96  |
| 2021 | Human  | Balego/Bayanga                | CAR               | 2.91  | 16.27  |

Abbreviations: CAR: Central African Republic; DRC: Democratic Republic of the Congo.

**Figure S1: Ecological niches of mammal species ranked between the 11th and 99th positions for their overlap with the MPXV niche.**

Black circles indicate localities used to build the distribution model. The probabilities of occurrence are highlighted using different colours: blue grey for probabilities  $< 0.5$ ; turquoise green for  $0.5 < p < 0.75$ ; yellowish green for  $0.75 < p < 0.9$ ; and yellow for  $p > 0.9$ . The red line is the IUCN distribution of the species [60]. At the left of the maps are indicated the number of occurrence records (n) used to infer the ecological niche, the Schoener's D and Hellinger's I values summarizing niche overlap between mammal species and MPXV, and the rank based on overlap analyses with the MPXV niche.

*Cercopithecus ascanius*

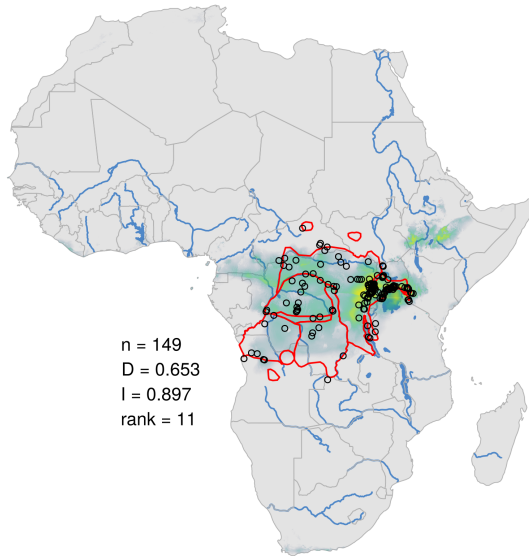

*Cercopithecus neglectus*

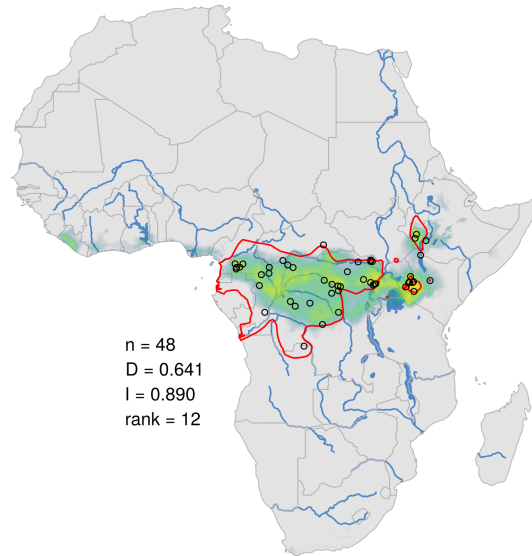

*Crocidura denti*

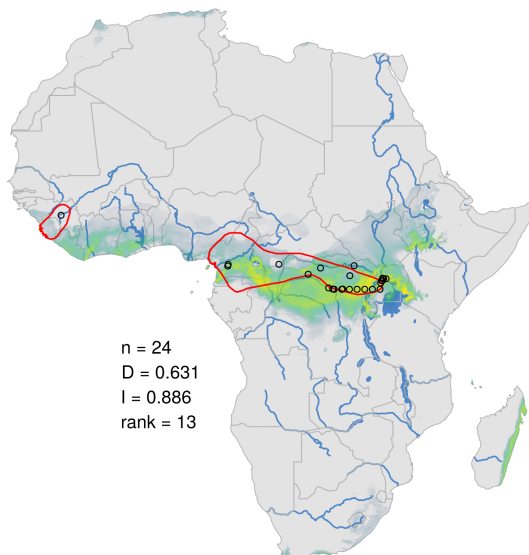

*Crocidura littoralis*

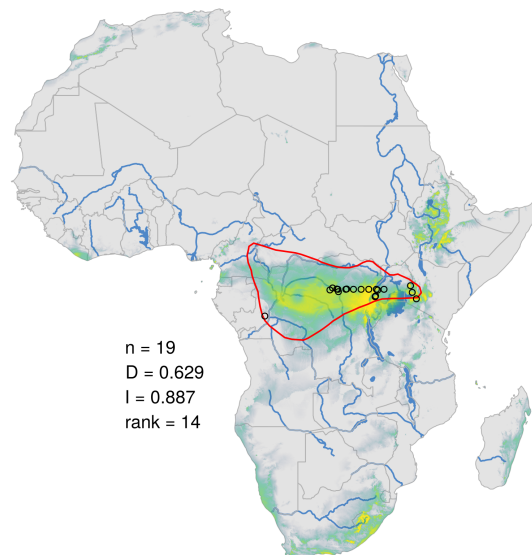

*Malacomys edwardsi*

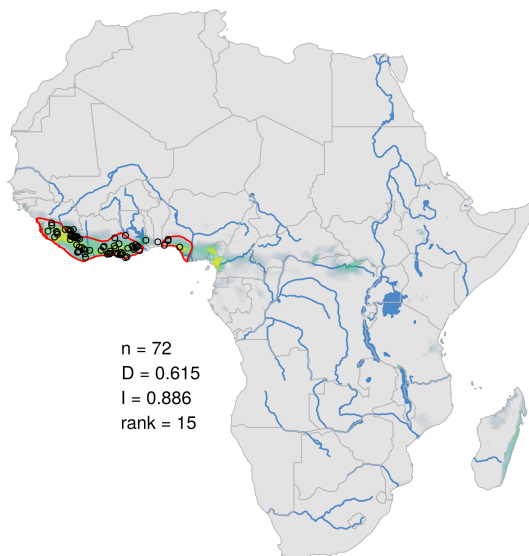

*Crocidura dolichura*

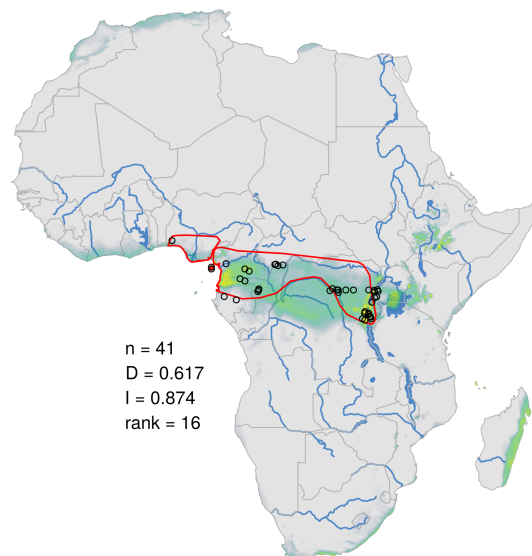

Probability  
0.25 0.50 0.75

*Cricetomys emini*

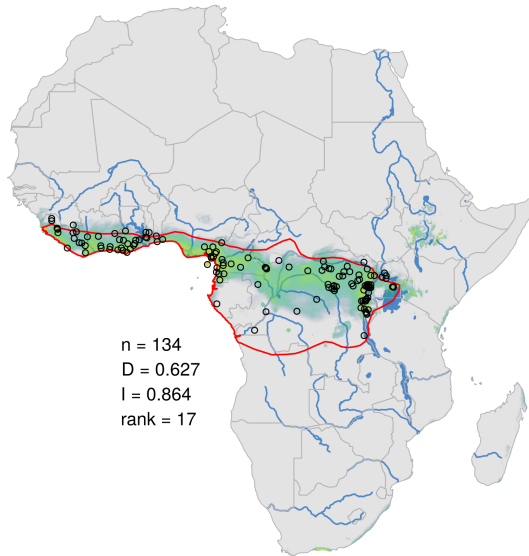

*Cercopithecus nictitans*

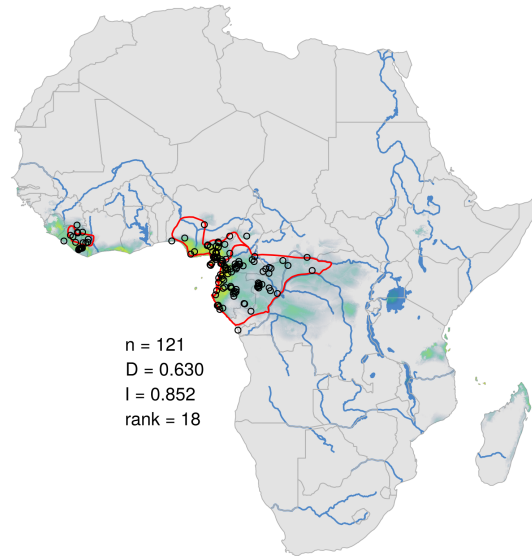

*Perodicticus edwardsi*

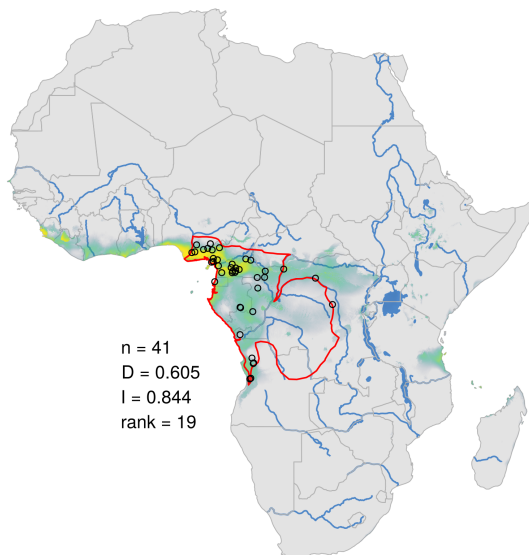

*Cricetomys gambianus*

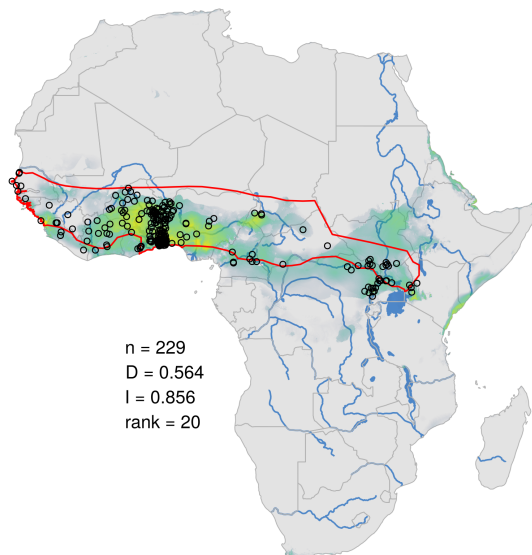

*Cercocebus agilis*

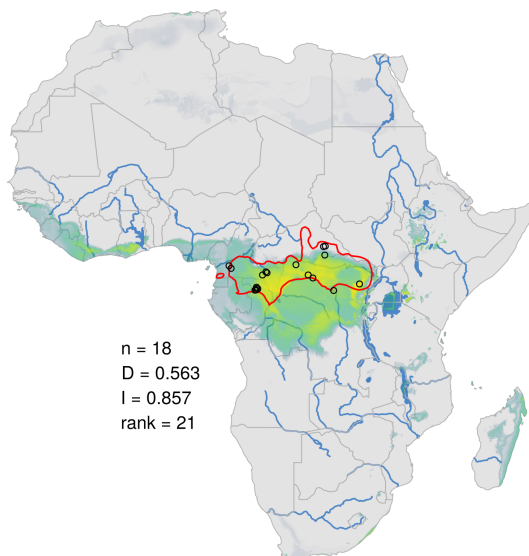

*Cercopithecus petaurista*

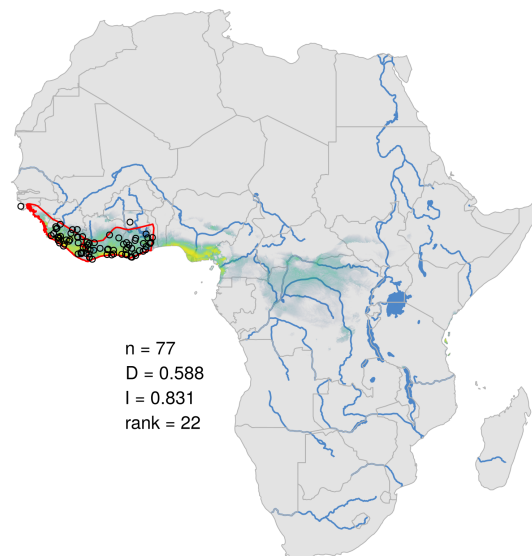

Probability

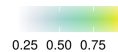

*Crocidura ludia*

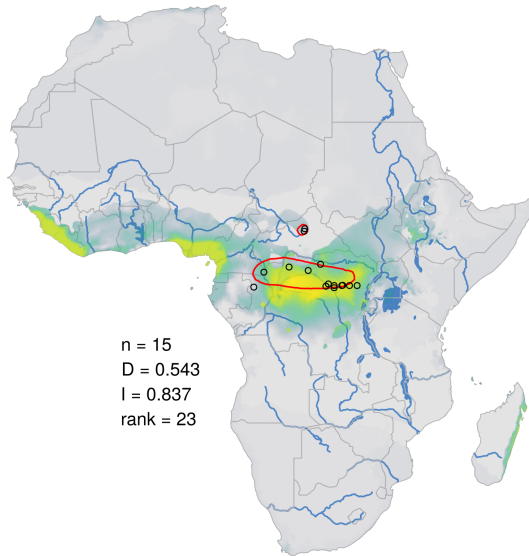

*Funisciurus isabella*

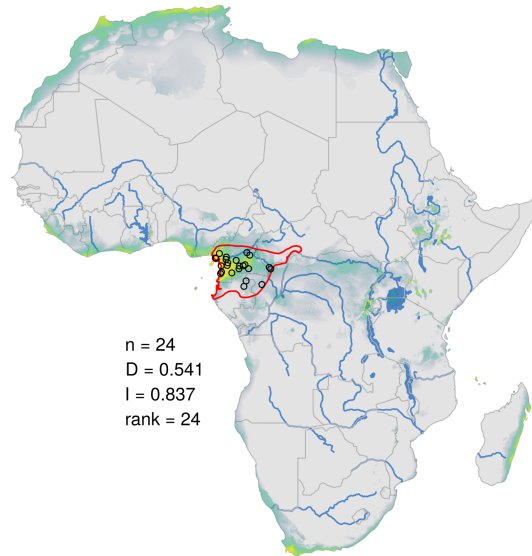

*Cercopithecus pogonias*

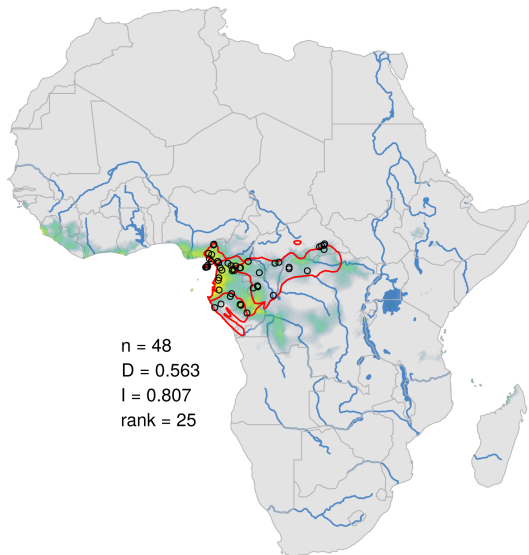

*Crocidura muricauda*

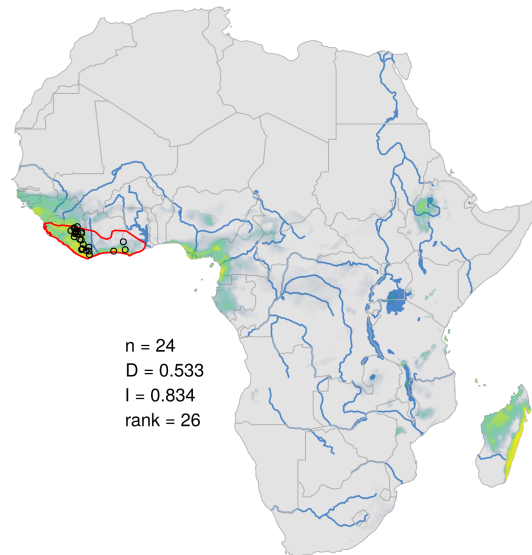

*Crocidura flavescens*

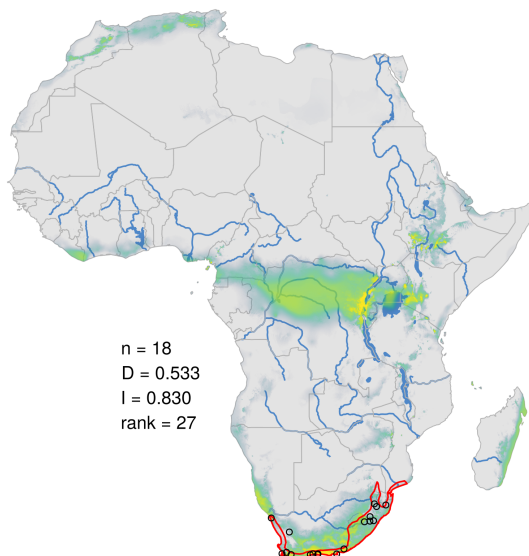

*Graphiurus nagtglasii*

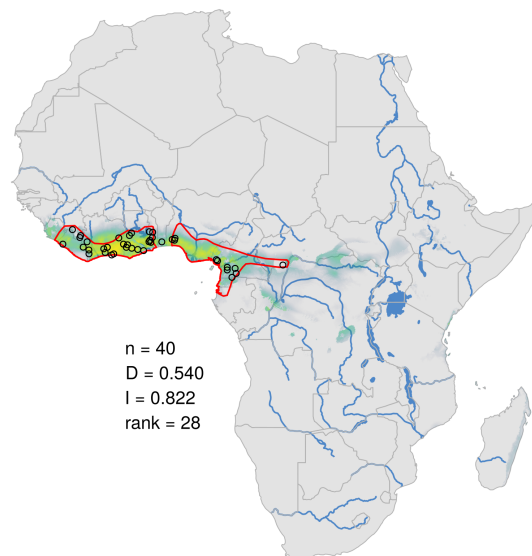

Probability  
0.25 0.50 0.75



*Funisciurus congicus*

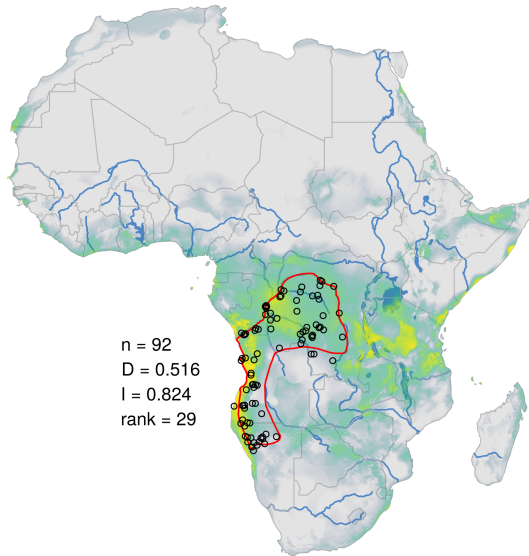

*Crocidura jacksoni*

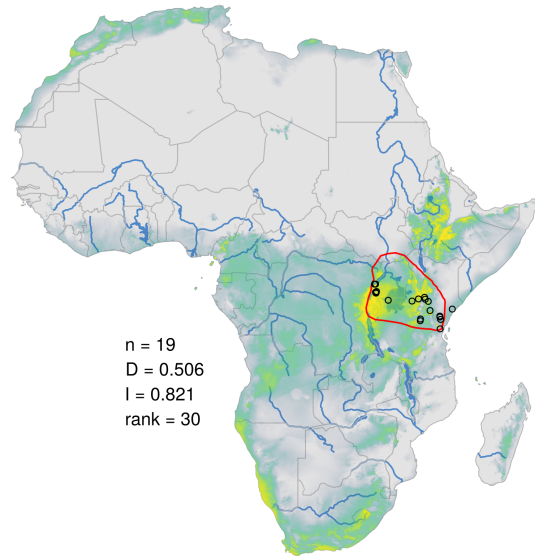

*Cercopithecus campbelli*

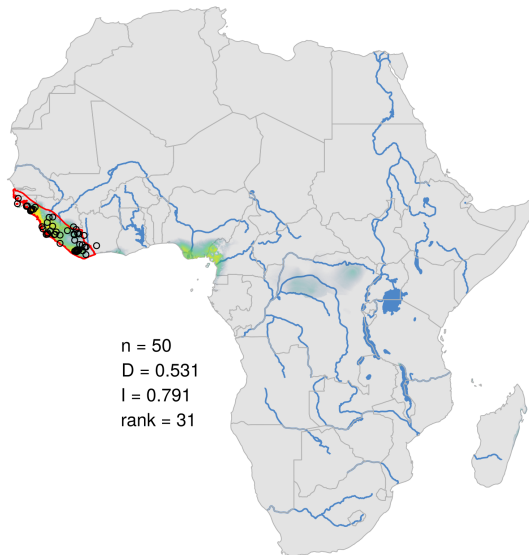

*Crocidura crossei*

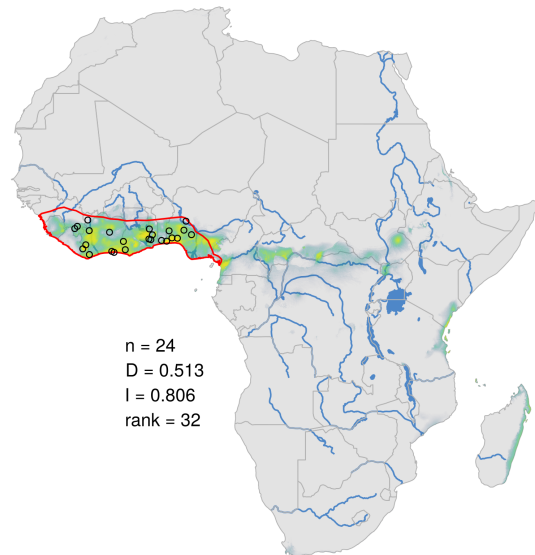

*Graphiurus kelleni*

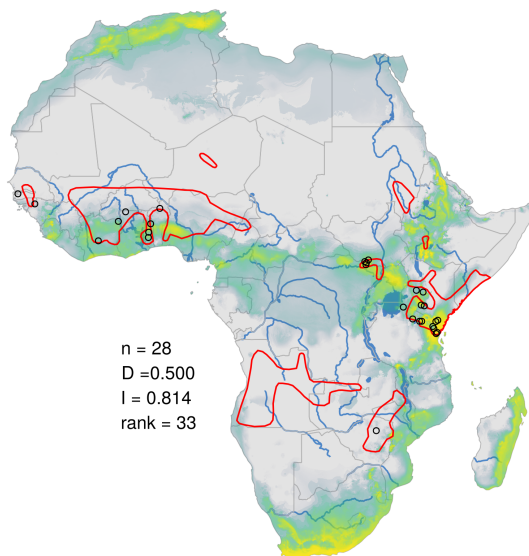

*Cercopithecus mitis*

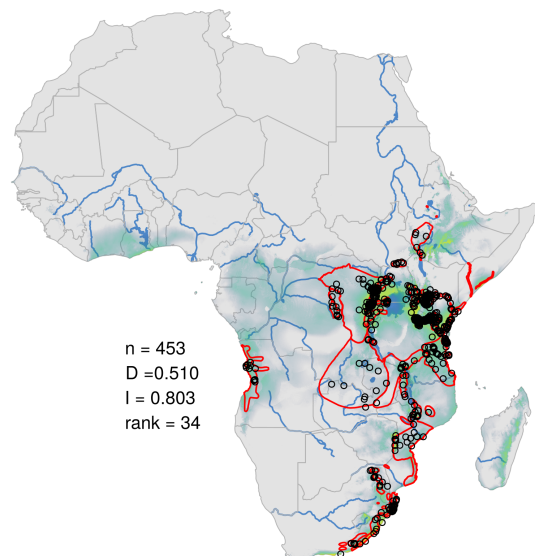

Probability 0.25 0.50 0.75

*Cercopithecus diana*

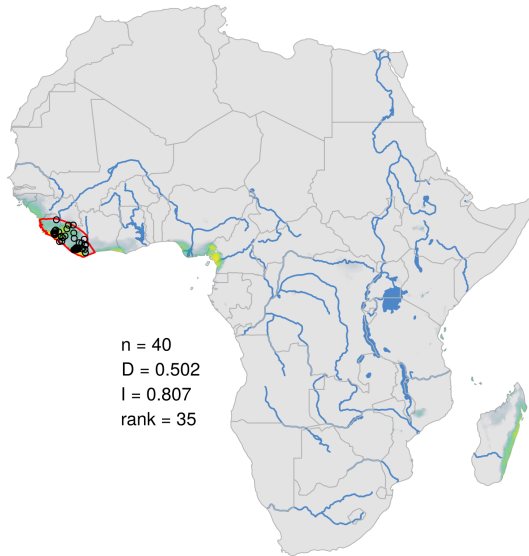

*Crocidura poensis*

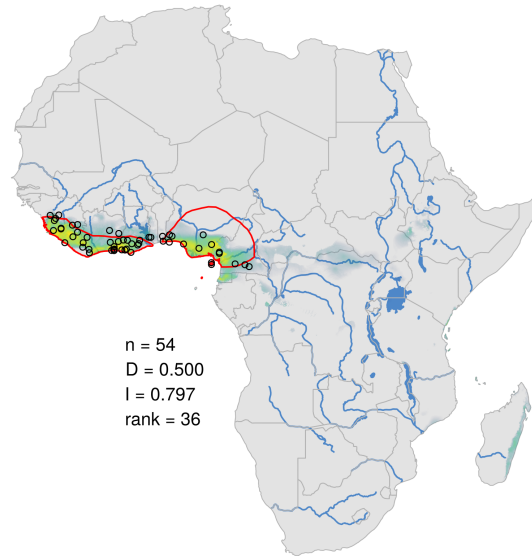

*Crocidura fulvastra*

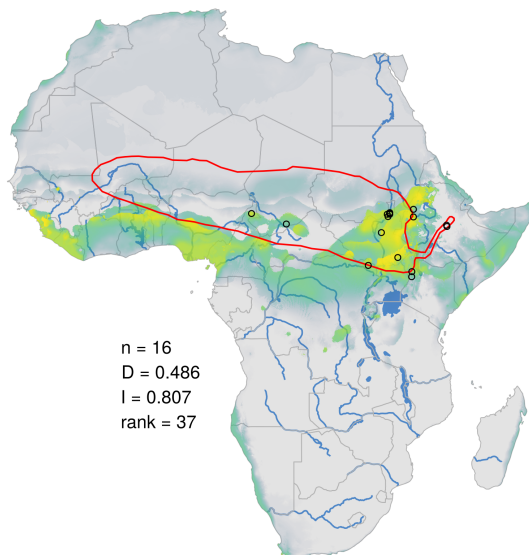

*Crocidura jouvenetae*

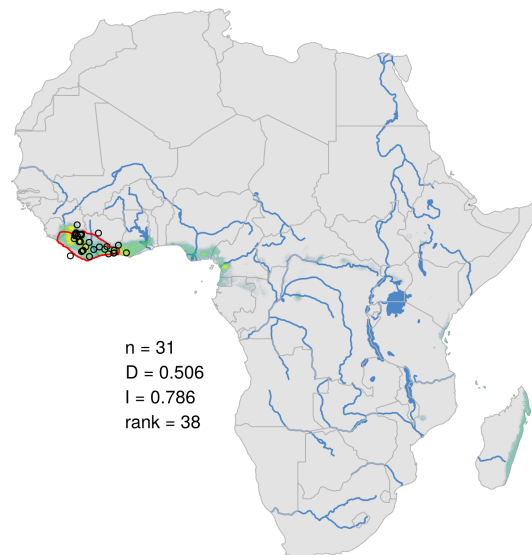

*Crocidura obscurior*

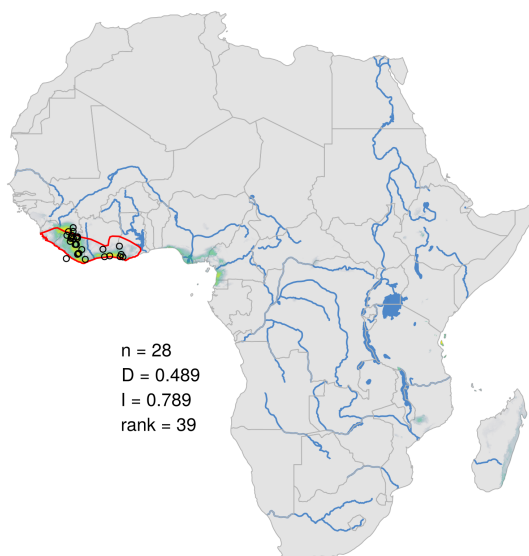

*Graphiurus christyi*

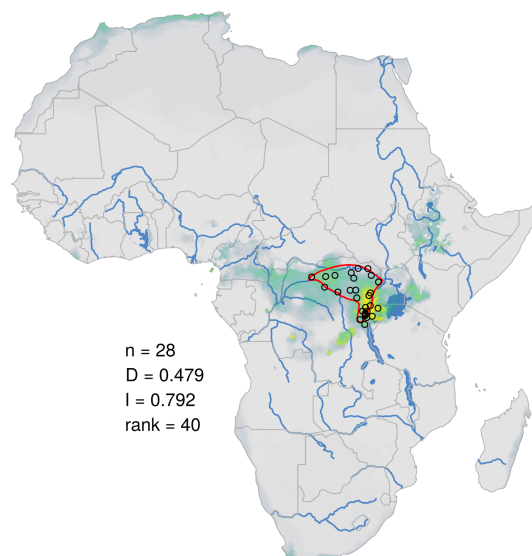

Probability

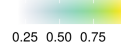

*Crocidura fuscomurina*

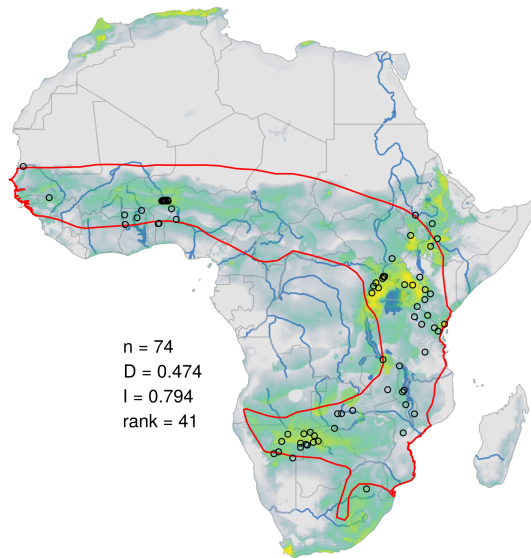

*Cercopithecus wolfi*

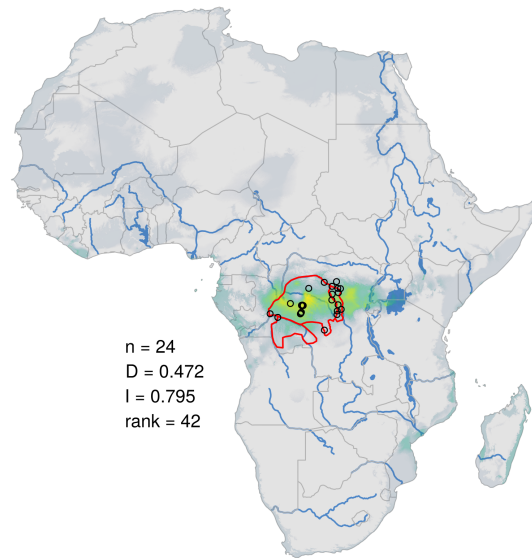

*Crocidura buettikoferi*

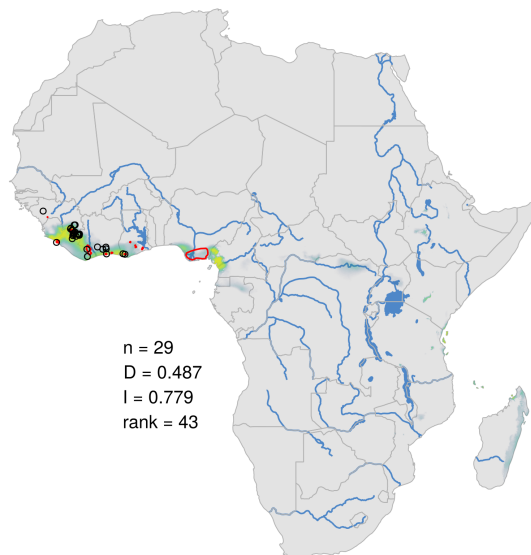

*Malacomys cansdalei*

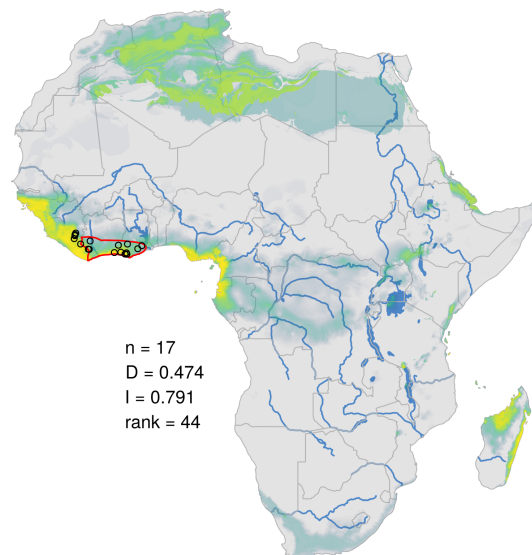

*Funisciurus leucogenys*

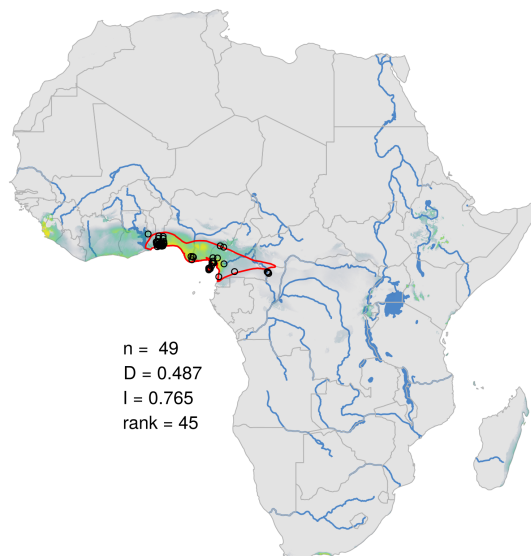

*Crocidura grandiceps*

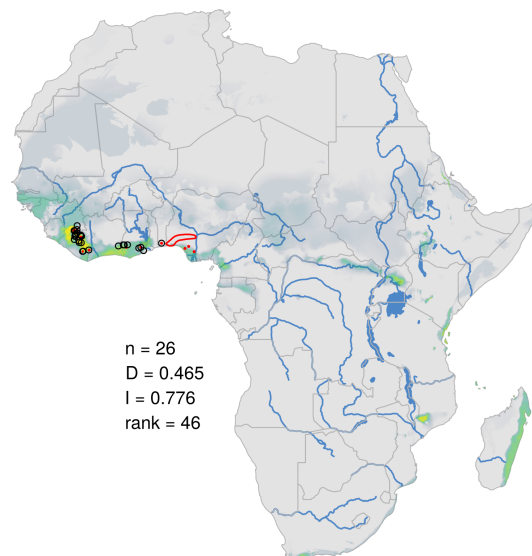

Probability



*Cricetomys ansorgei*

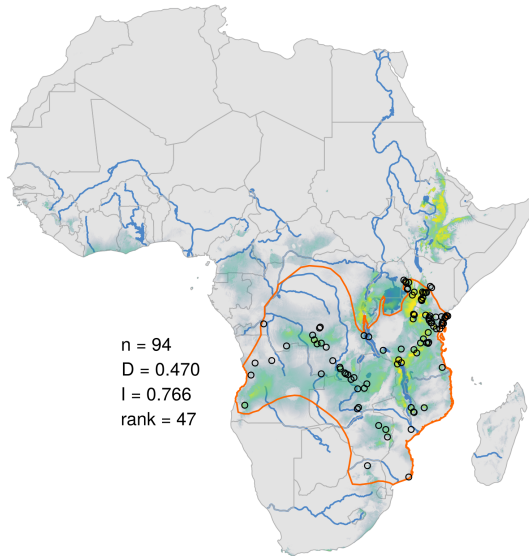

*Heliosciurus punctatus*

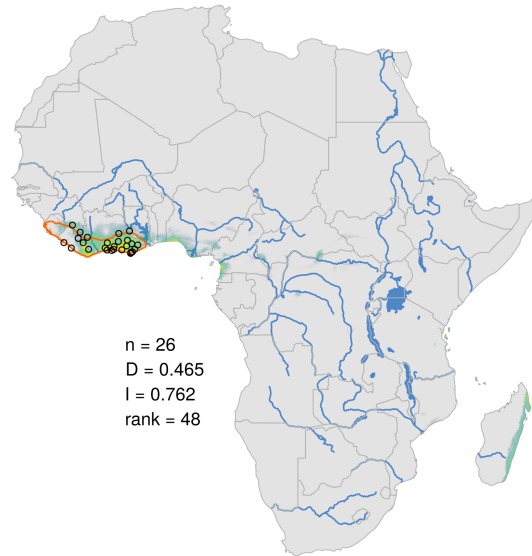

*Crocidura goliath*

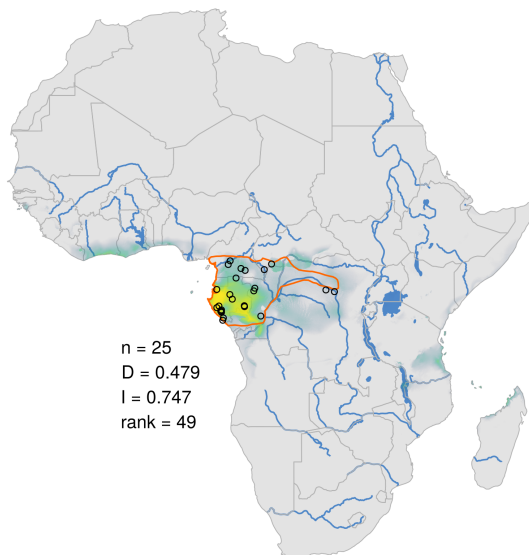

*Crocidura elgonius*

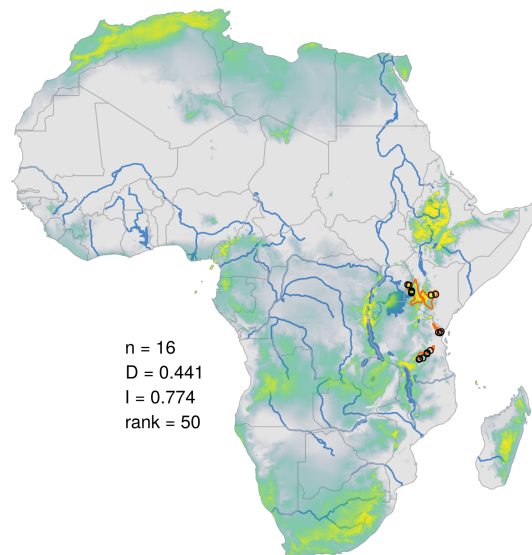

*Chlorocebus tantalus*

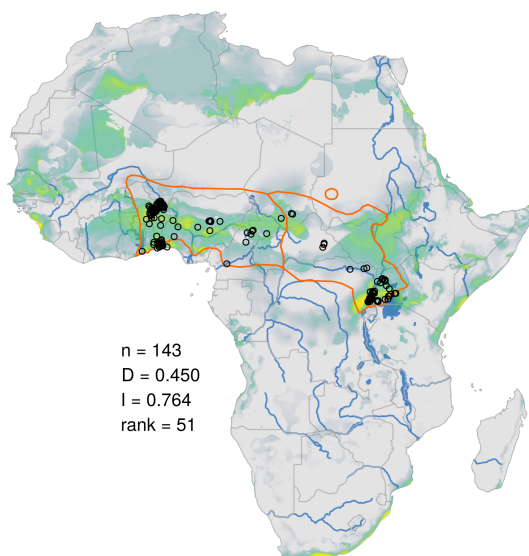

*Crocidura crenata*

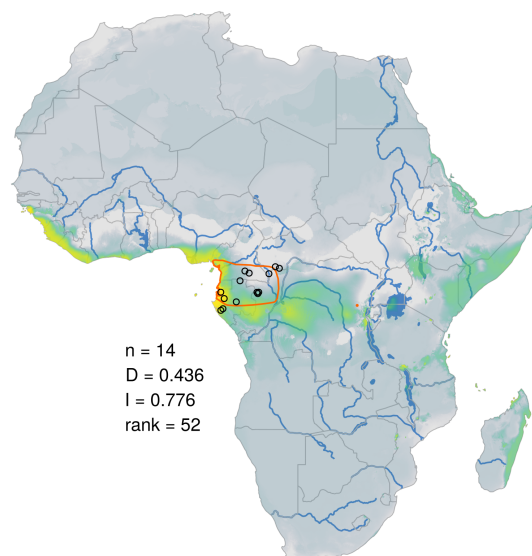

Probability 0.25 0.50 0.75



*Xerus erythropus*

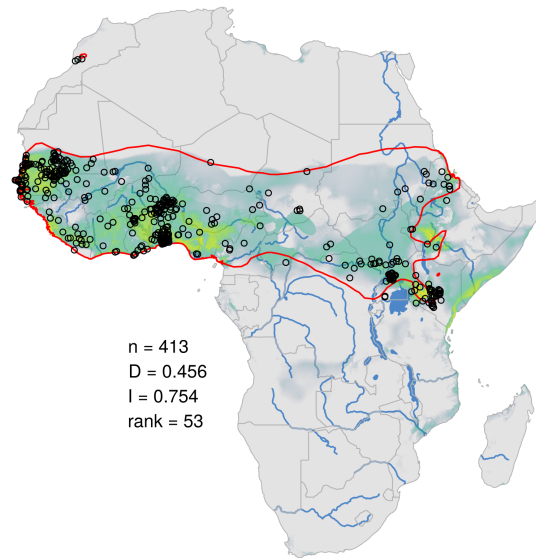

*Crocidura turba*

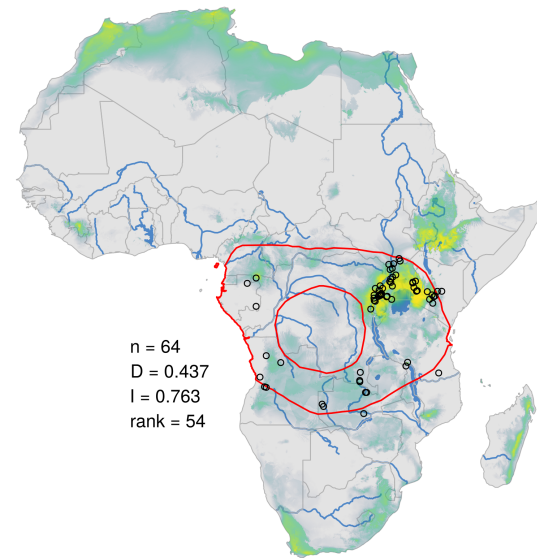

*Funisciurus substriatus*

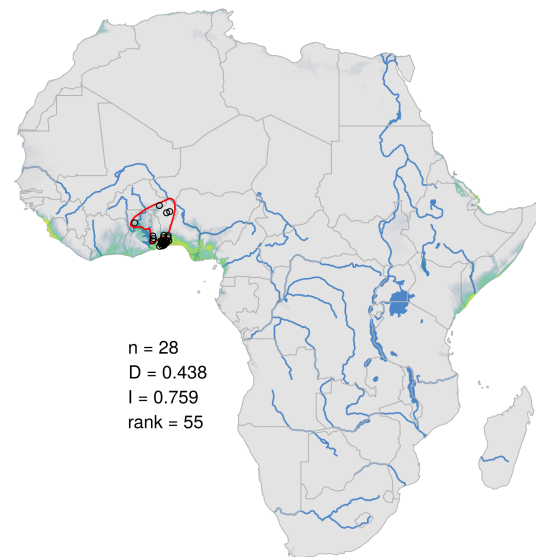

*Crocidura lamottei*

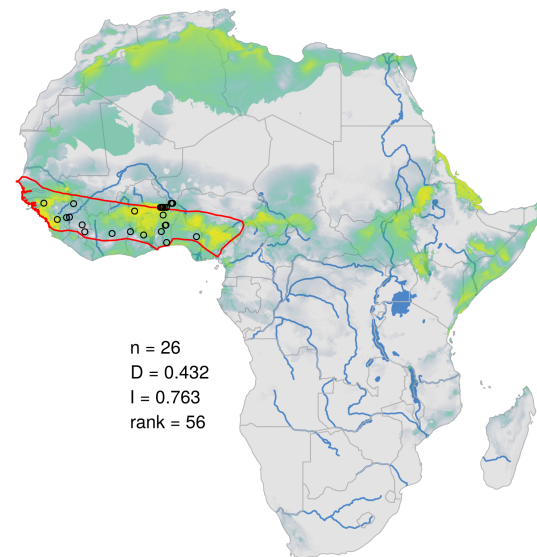

*Funisciurus lemniscatus*

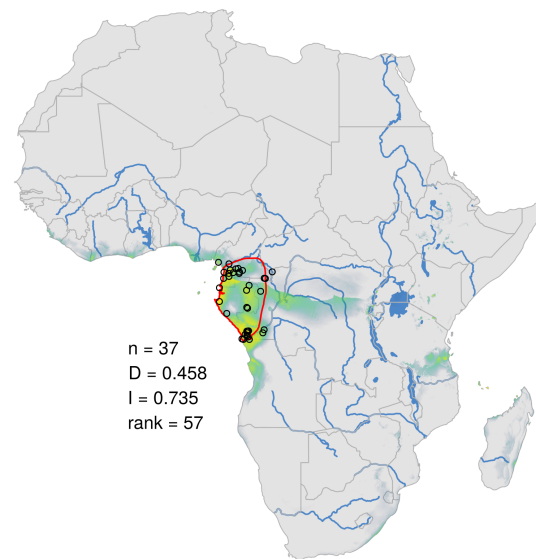

*Cercocebus atys*

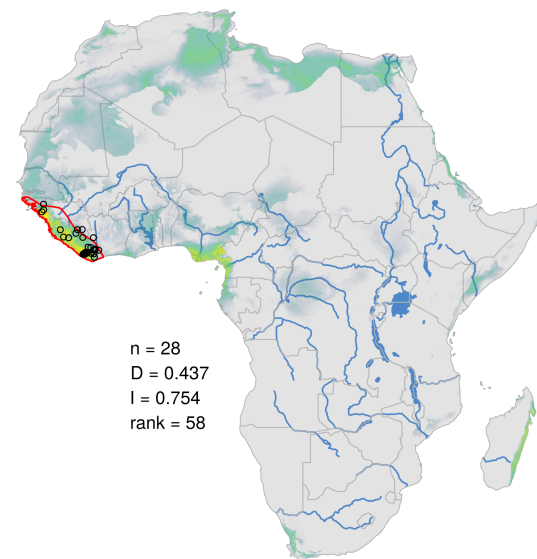

Probability 0.25 0.50 0.75

*Crocidura hildegardae*

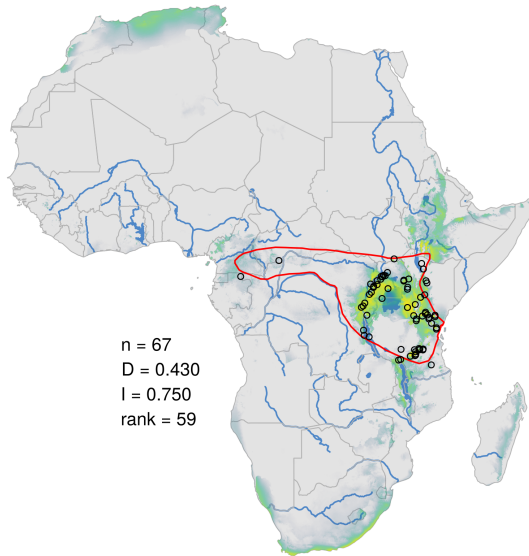

*Crocidura luna*

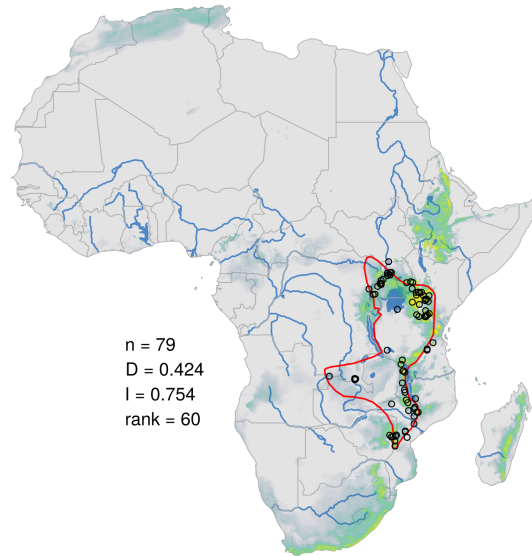

*Atelerix albiventris*

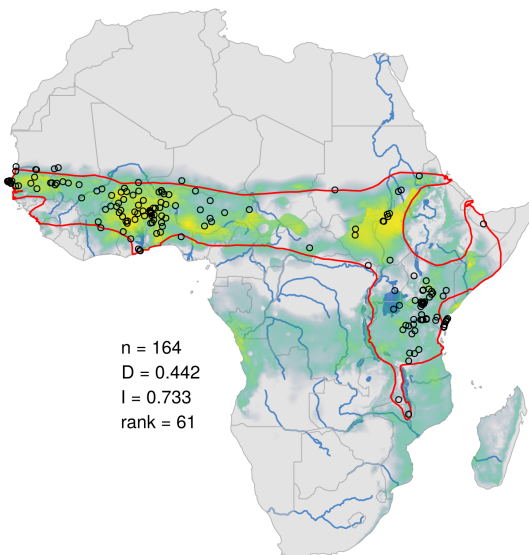

*Graphiurus crassicaudatus*

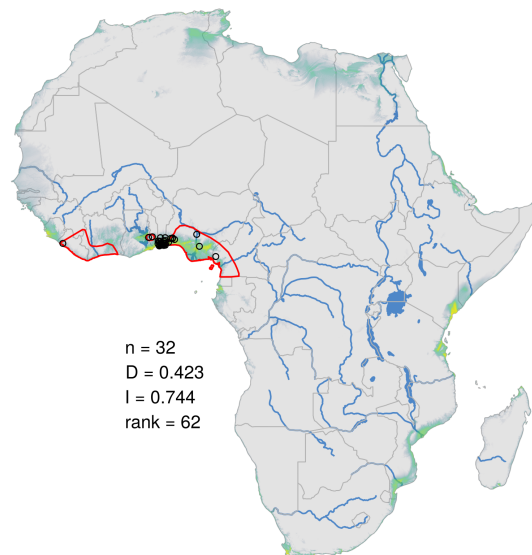

*Ptilocolobus badius*

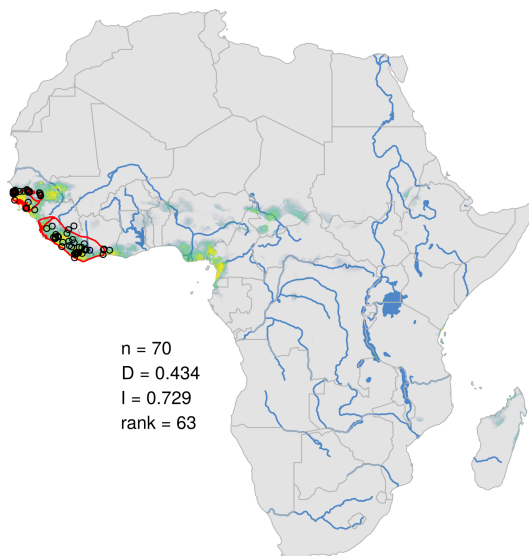

*Cercocebus torquatus*

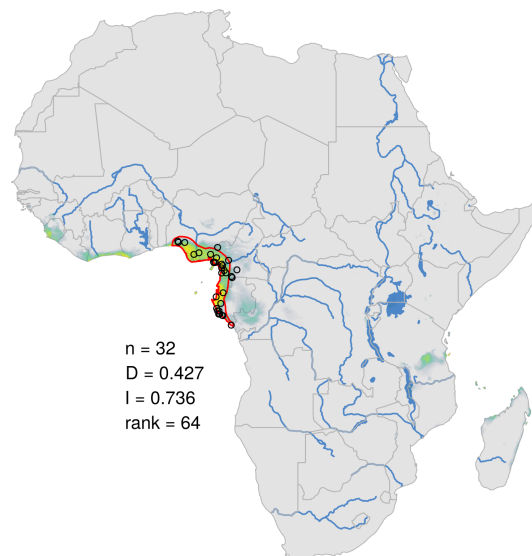

Probability

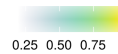

*Heliosciurus gambianus*

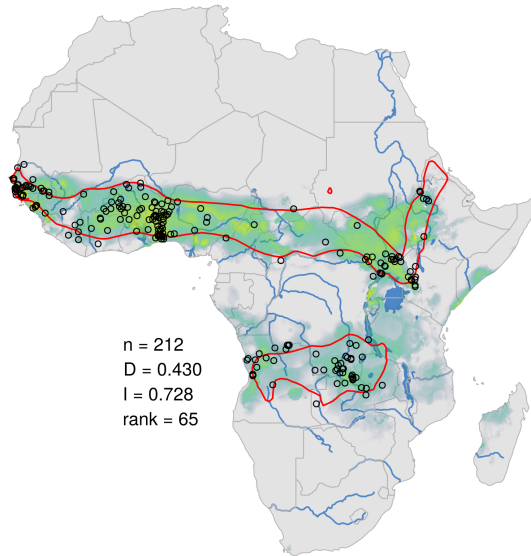

*Perodicticus potto*

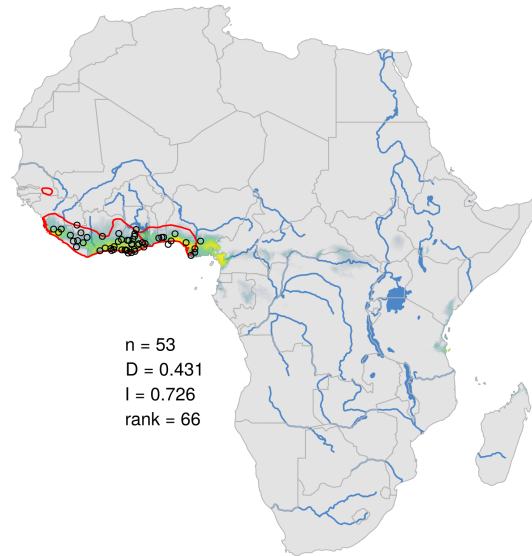

*Crocidura parvipes*

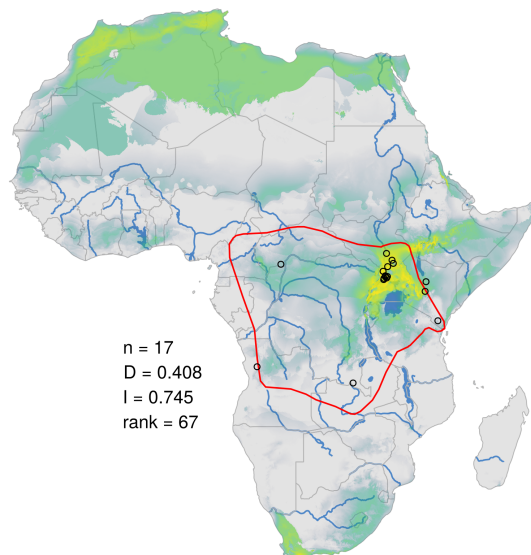

*Crocidura maurisca*

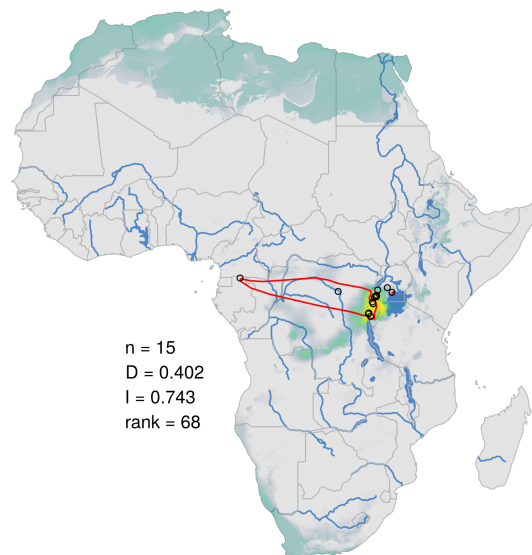

*Cercopithecus erythrogaster*

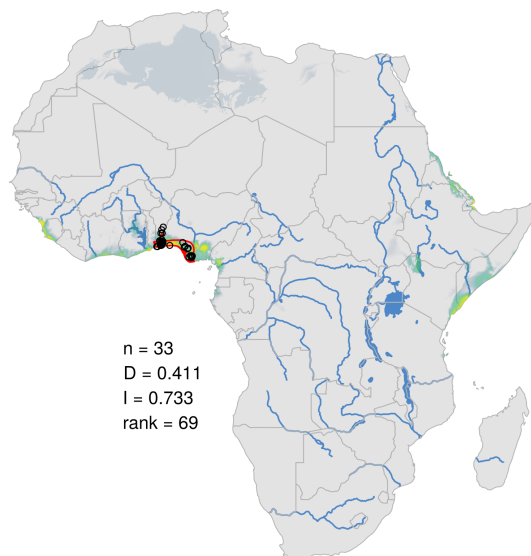

*Perodicticus ibeanus*

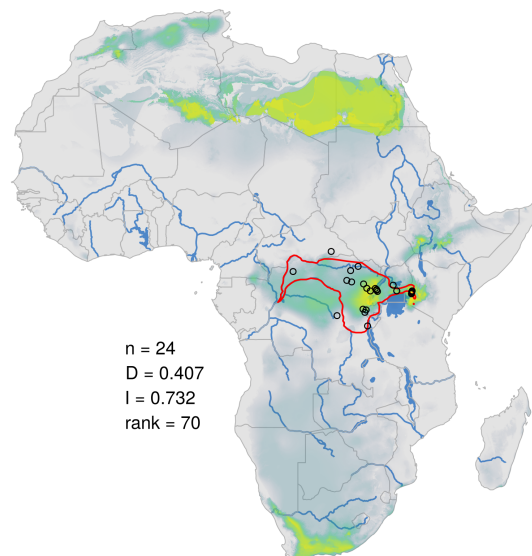

Probability  
0.25 0.50 0.75

*Cercopithecus erythrotis*

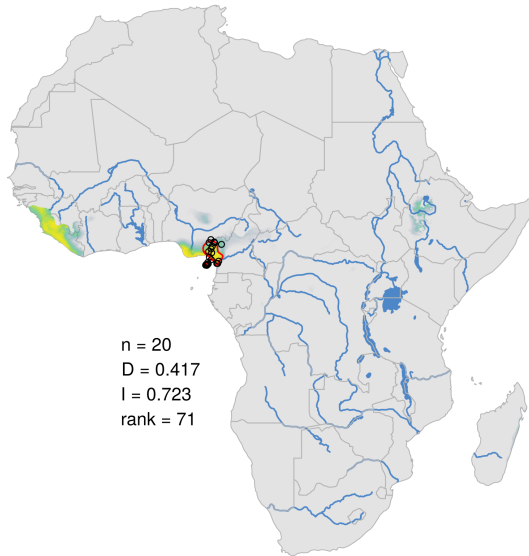

*Crocidura foxi*

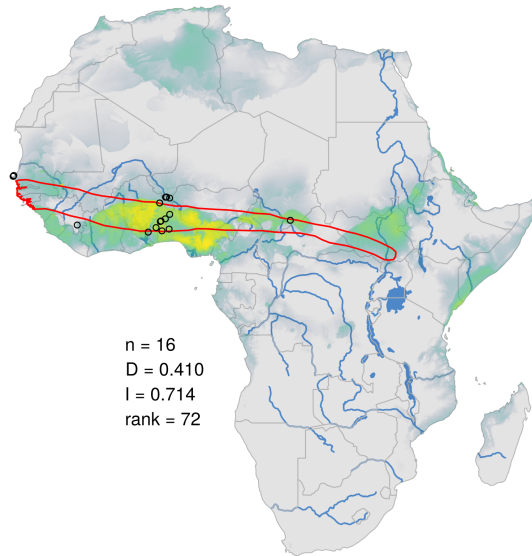

*Graphiurus murinus*

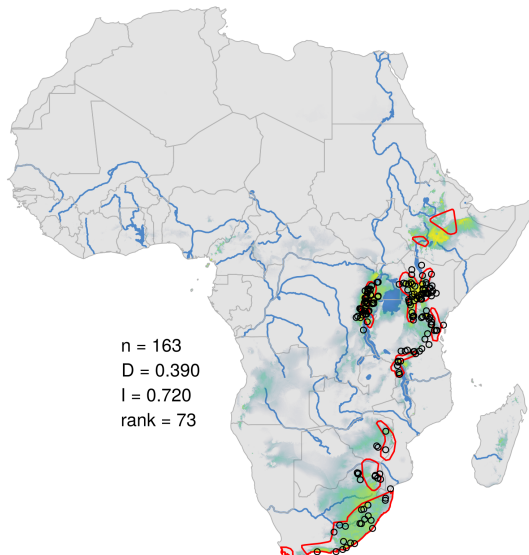

*Cercopithecus cephus*

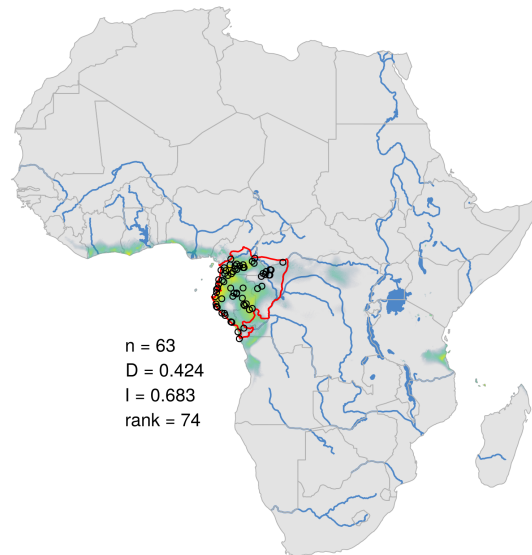

*Petrodromus tetradactylus*

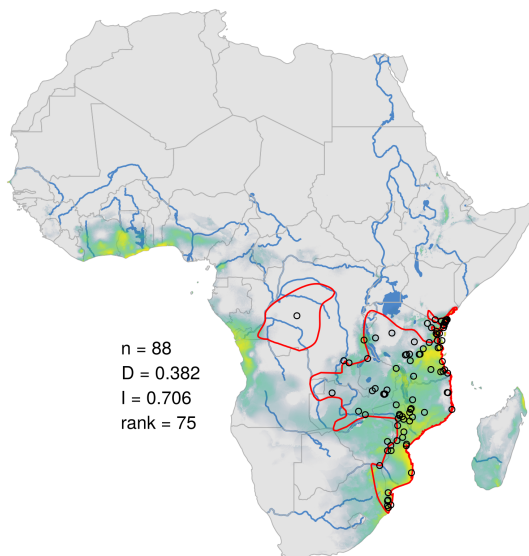

*Chlorocebus aethiops*

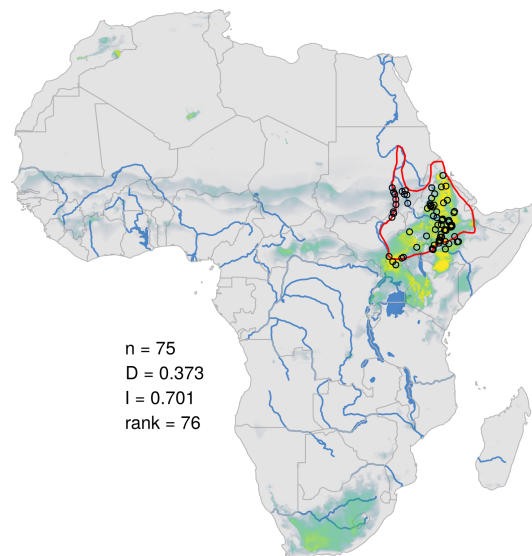

Probability

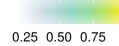



*Cercopithecus mona*

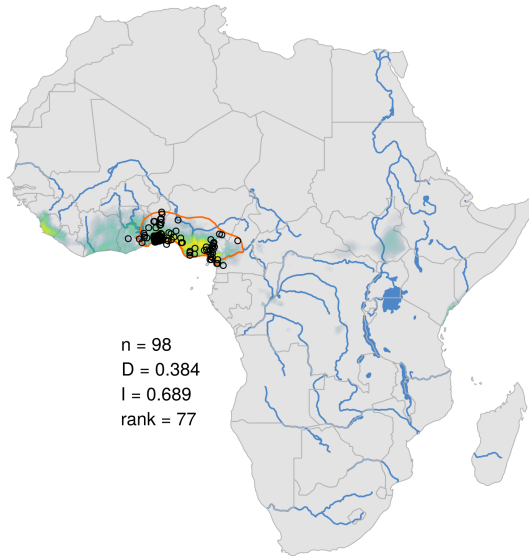

*Chlorocebus pygerythrus*

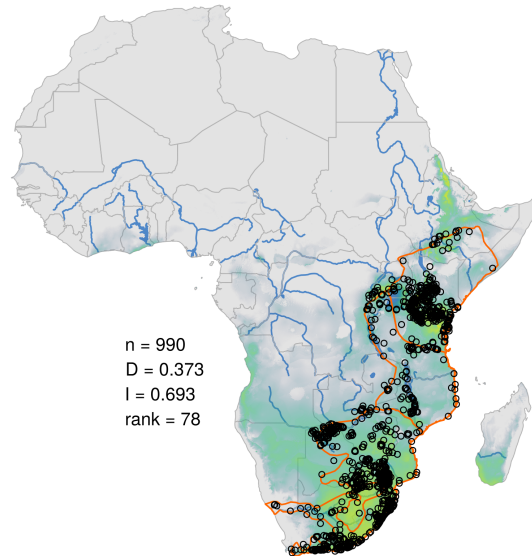

*Crocidura nigrofusca*

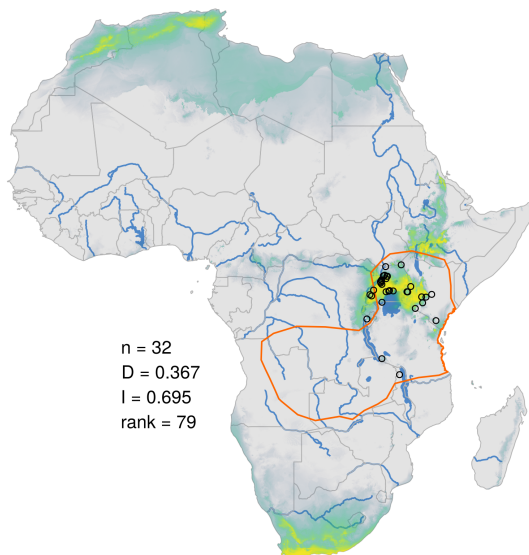

*Graphiurus microtis*

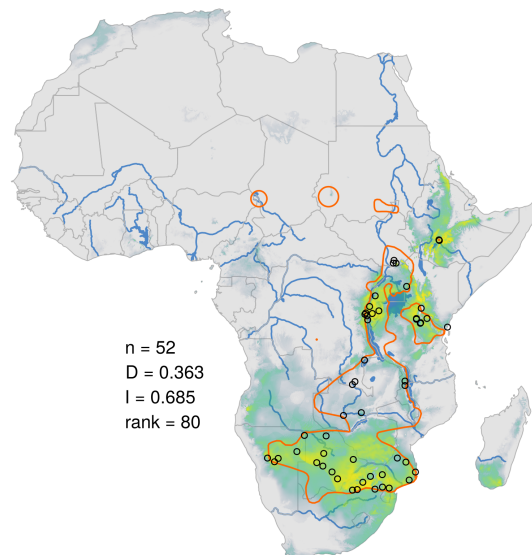

*Ptilocolobus tephrosceles*

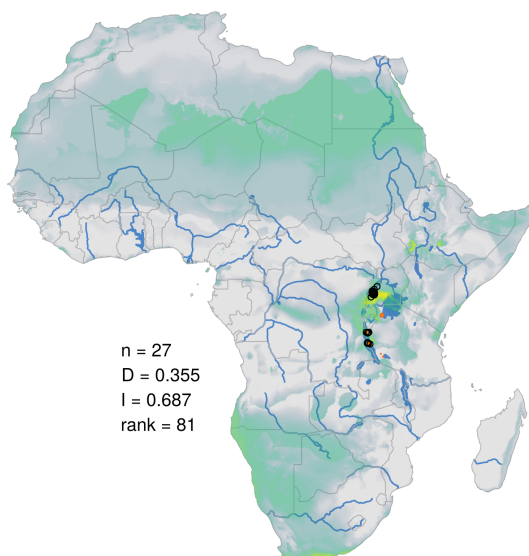

*Cercopithecus lowei*

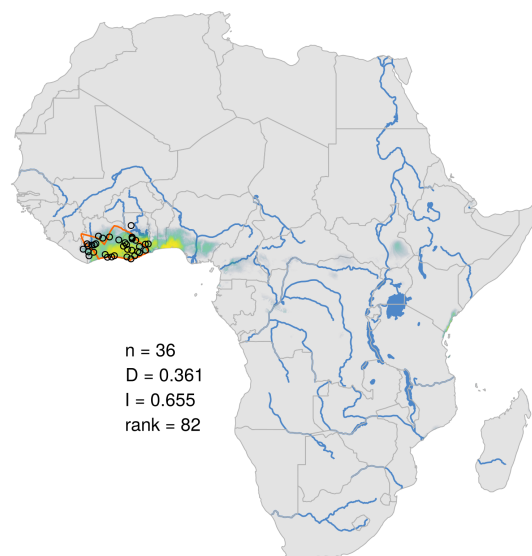

Probability  
0.25 0.50 0.75

*Crocidura alleix*

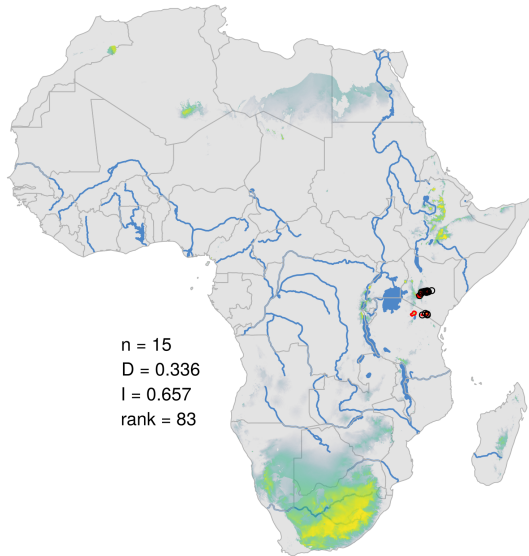

*Crocidura mariquensis*

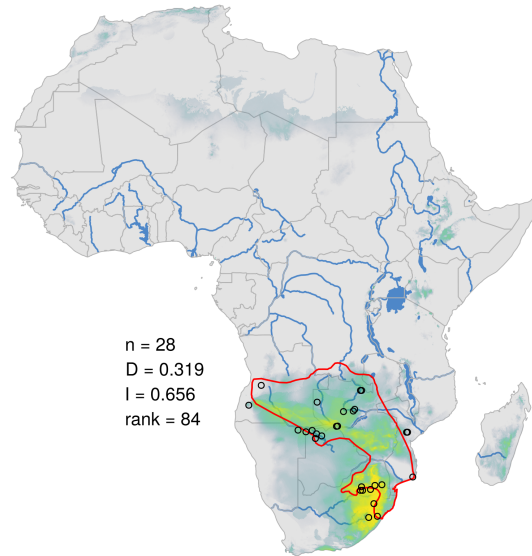

*Heliosciurus ruwenzorii*

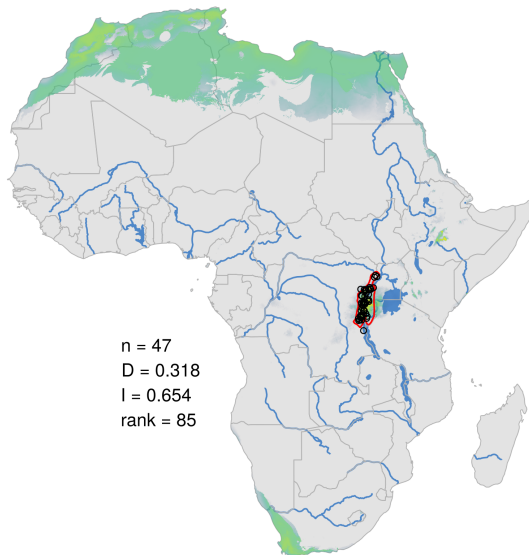

*Funisciurus carruthersi*

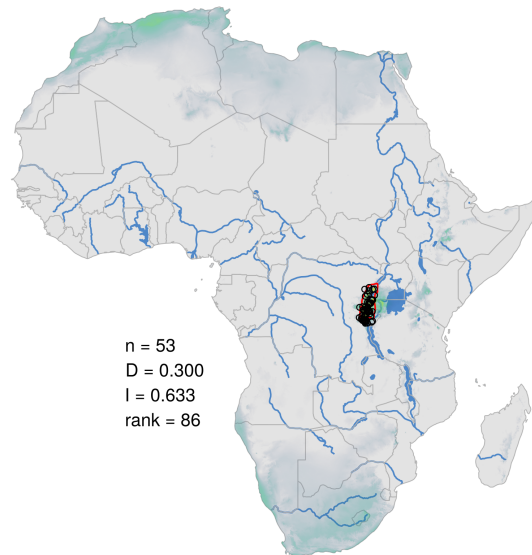

*Chlorocebus sabaeus*

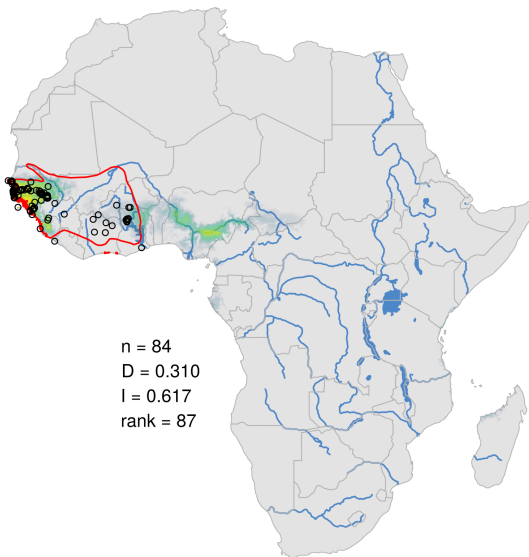

*Heliosciurus undulatus*

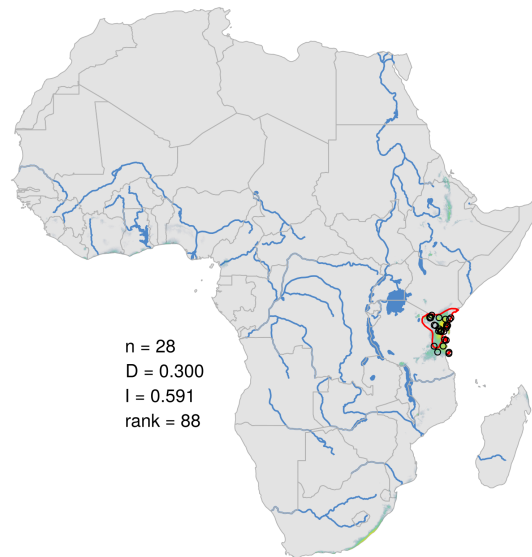

Probability



*Crocidura cyanea*

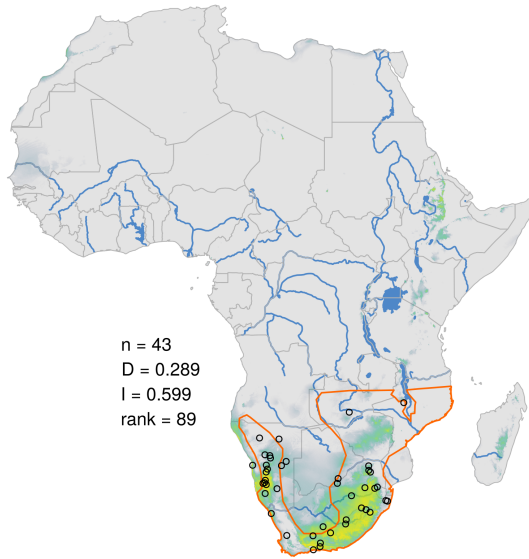

*Crocidura hirta*

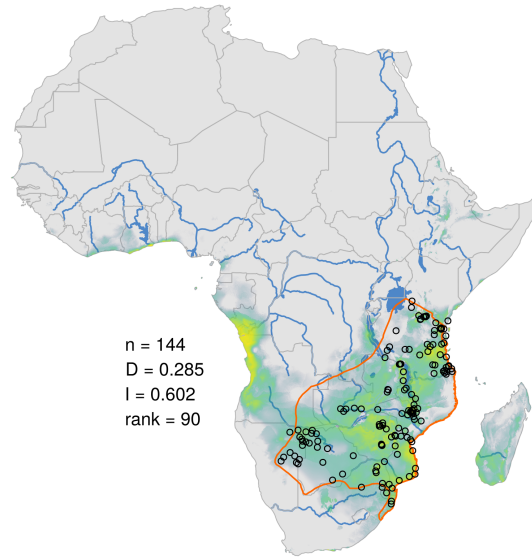

*Crocidura fumosa*

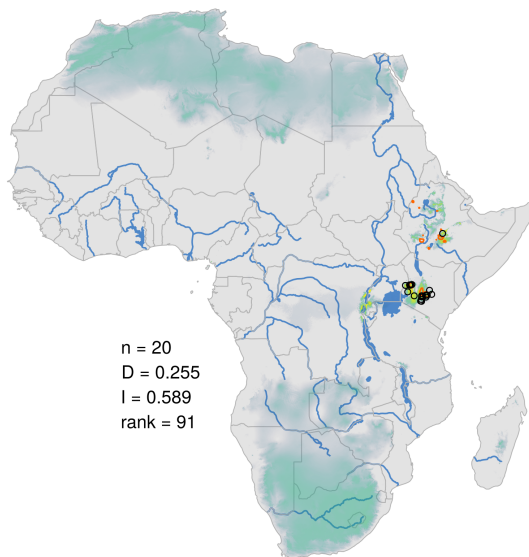

*Xerus princeps*

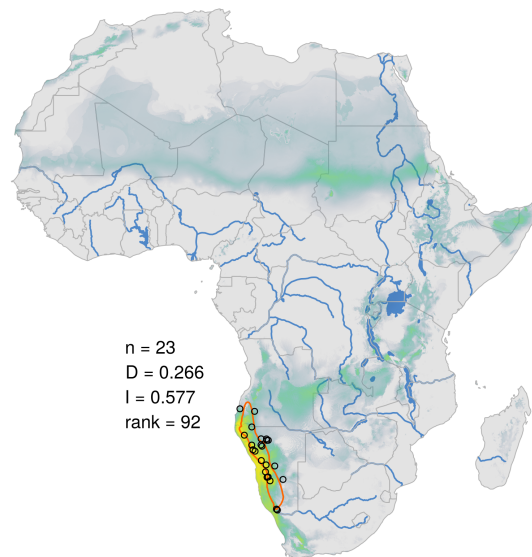

*Chlorocebus cynosuros*

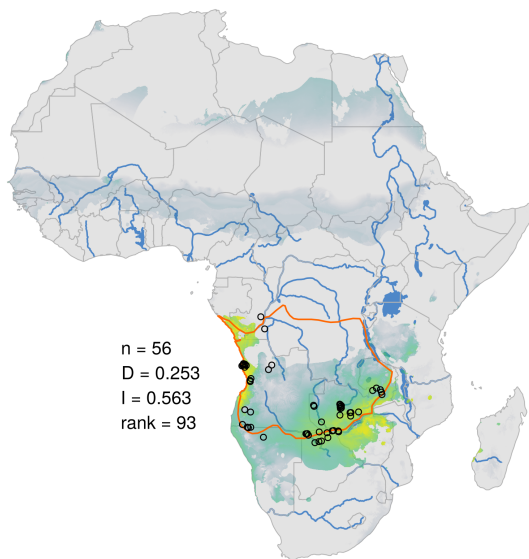

*Xerus rutilus*

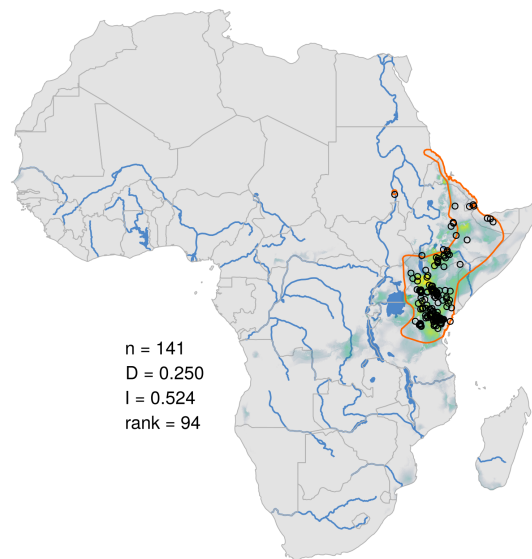

Probability

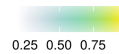

*Heliosciurus mutabilis*

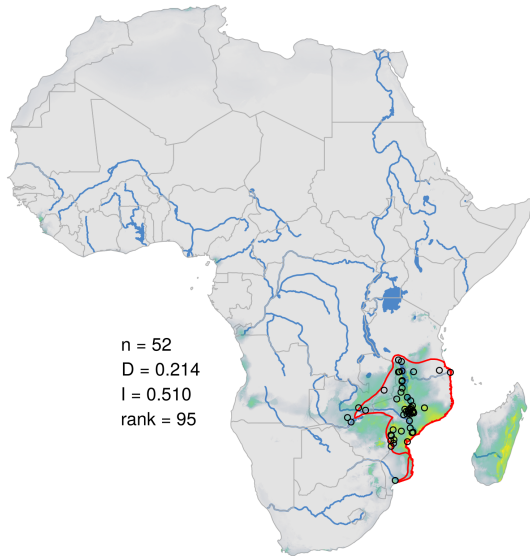

*Xerus inauris*

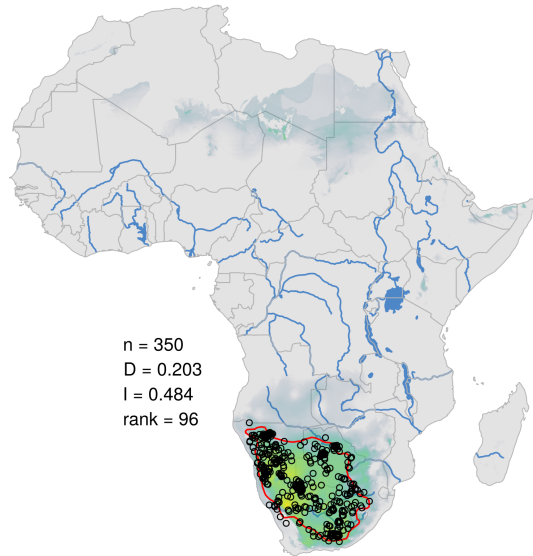

*Atelerix frontalis*

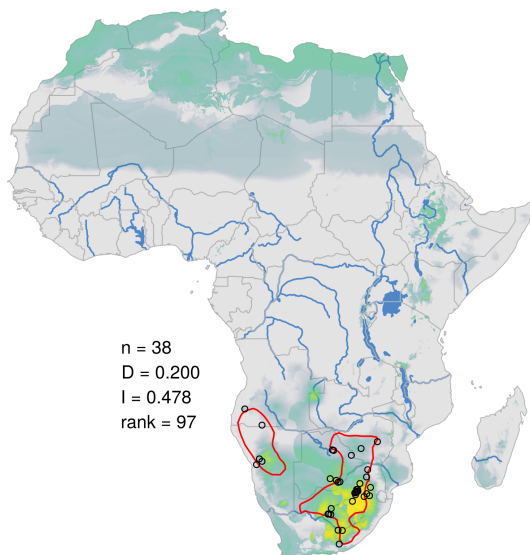

*Jaculus jaculus*

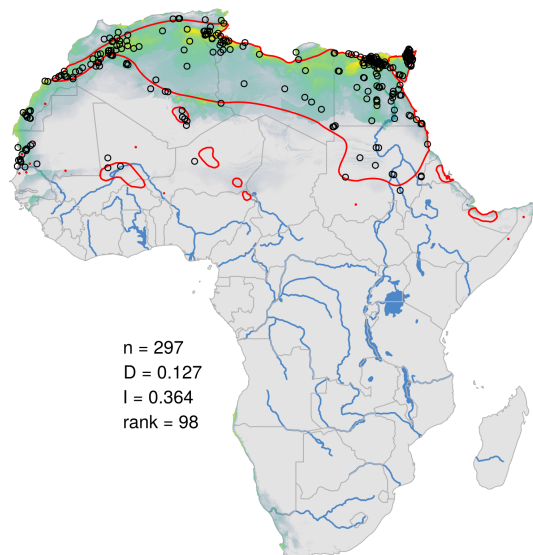

*Graphiurus ocellaris*

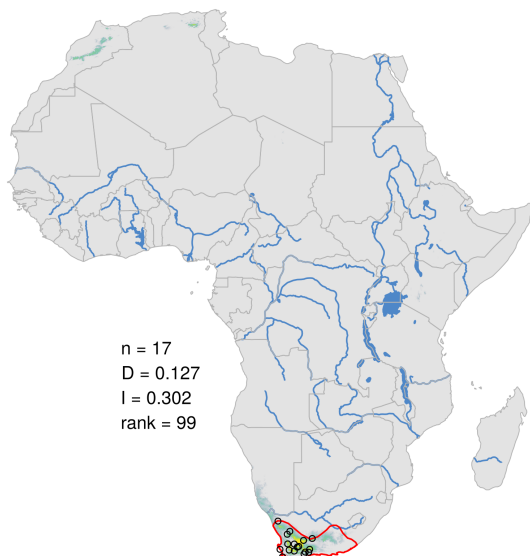

Probability 0.25 0.50 0.75

**Figure S2: Standard deviation calculated for the ecological niche of MPXV and that of the 10 mammal species showing the best overlap with the MPXV niche.**

Black circles indicate localities used to build the distribution model. The probabilities of occurrence are highlighted using different colours: blue grey for standard deviation  $< 0.2$ ; turquoise green for  $0.2 < sd < 0.3$ ; yellowish green for  $0.3 < sd < 0.35$ ; and yellow for  $sd > 0.4$ . The red line is the IUCN distribution of the species [60]. At the left of the maps are indicated the number of occurrence records (n) used to infer the ecological niche, the Schoener's D and Hellinger's I values summarizing niche overlap between mammal species and MPXV, and the rank based on overlap analyses with the MPXV niche.



MPXV

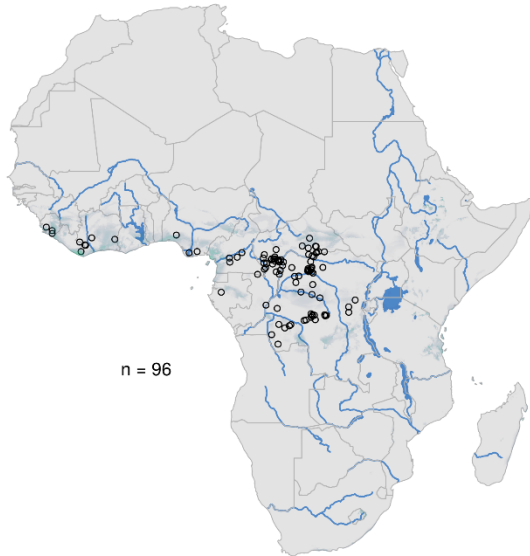

*Funisciurus anerythrus*

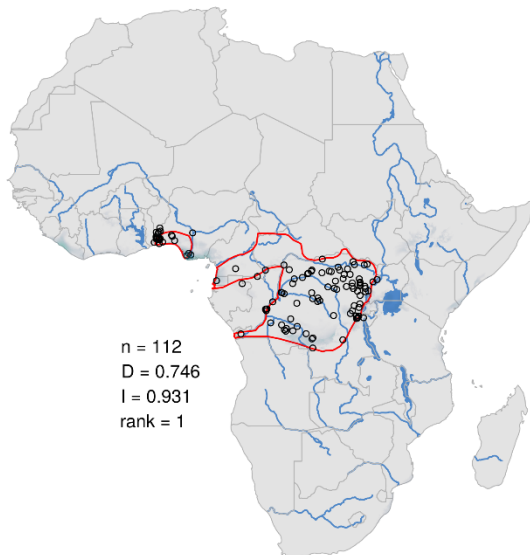

*Graphiurus lorraineus*

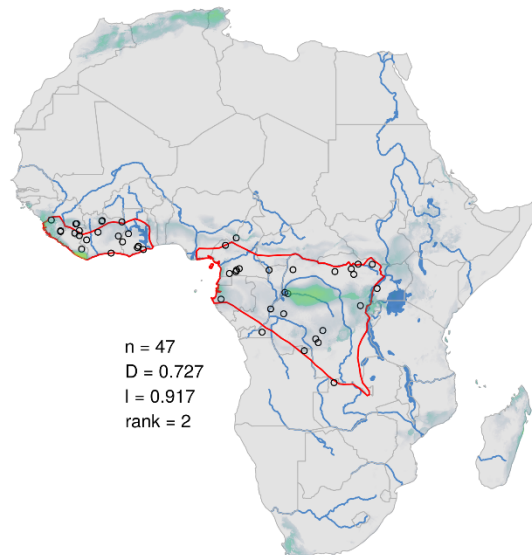

*Funisciurus pyrropus*

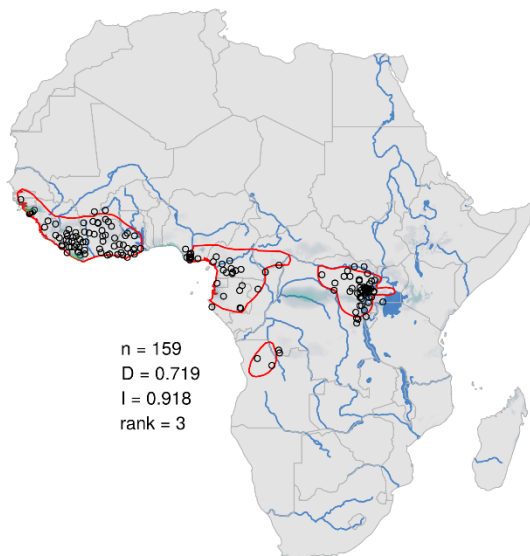

*Heliosciurus rufobrachium*

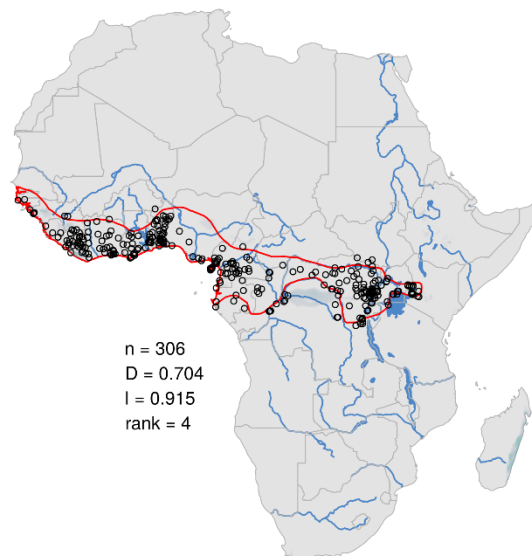

Probability  
0.0 0.1 0.2 0.3 0.4

*Stochomys longicaudatus*

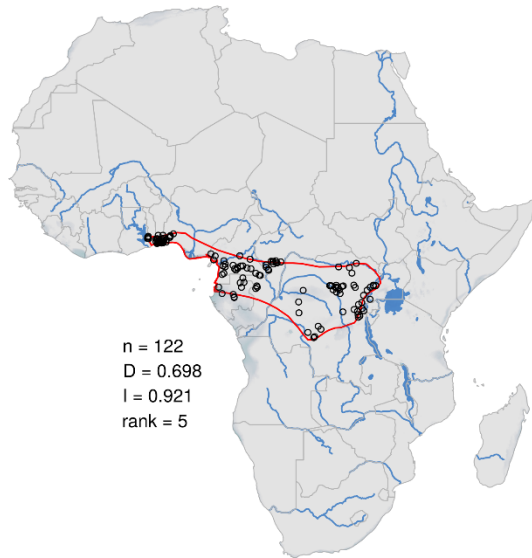

*Malacomys longipes*

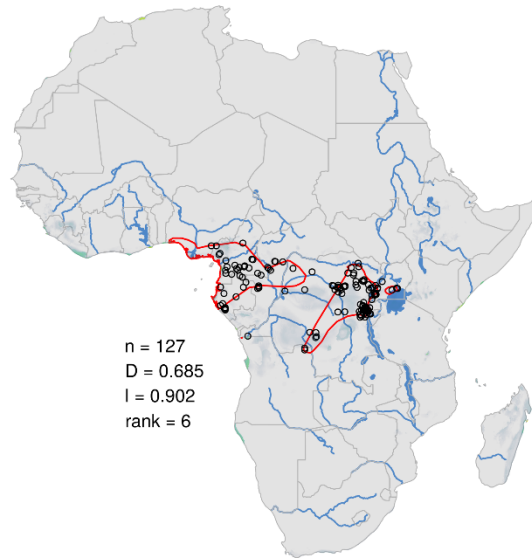

*Pan troglodytes*

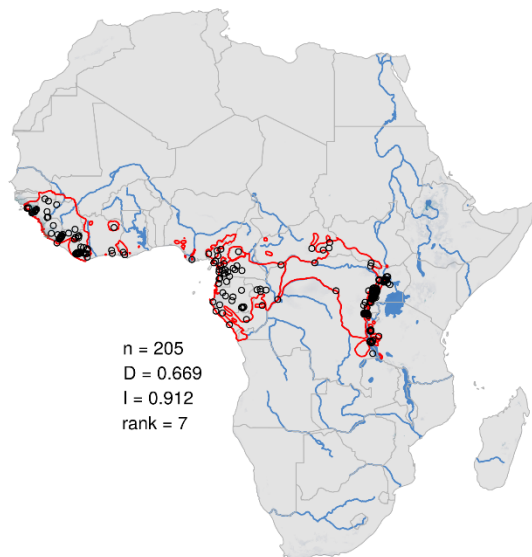

*Oenomys hypoxanthus*

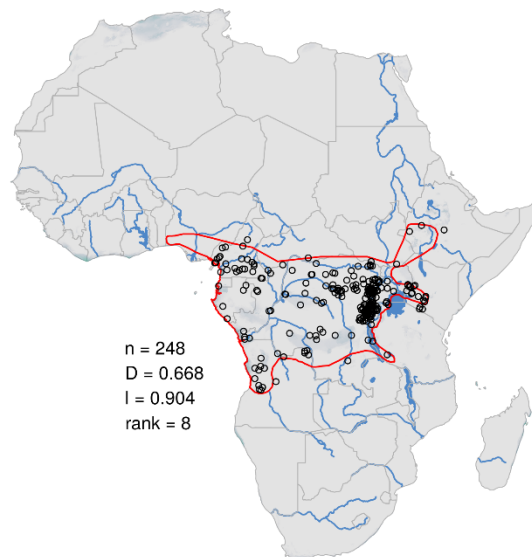

*Crocidura olivieri*

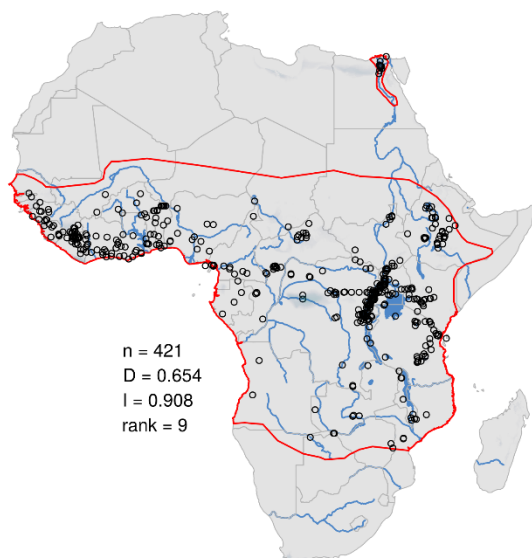

*Crocidura theresae*

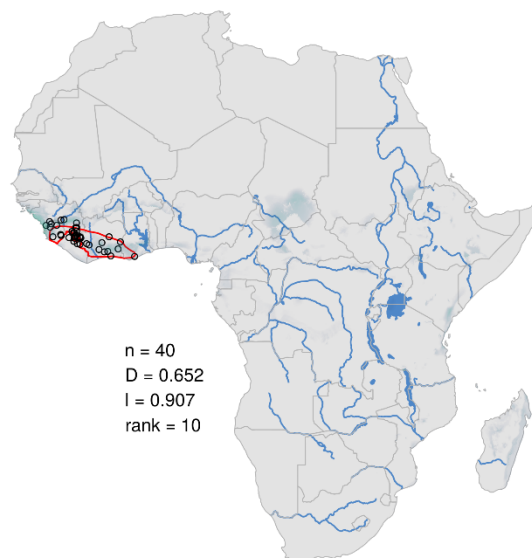

Probability  
0.0 0.1 0.2 0.3 0.4
